# Supplementary material
Source: PubMed Central journal article supplement (PMC5124540)
Supplement: NIHMS804713-supplement-Supplemental_Figures_1-10.pdf [file NIHMS804713-supplement-Supplemental_Figures_1-10.pdf]

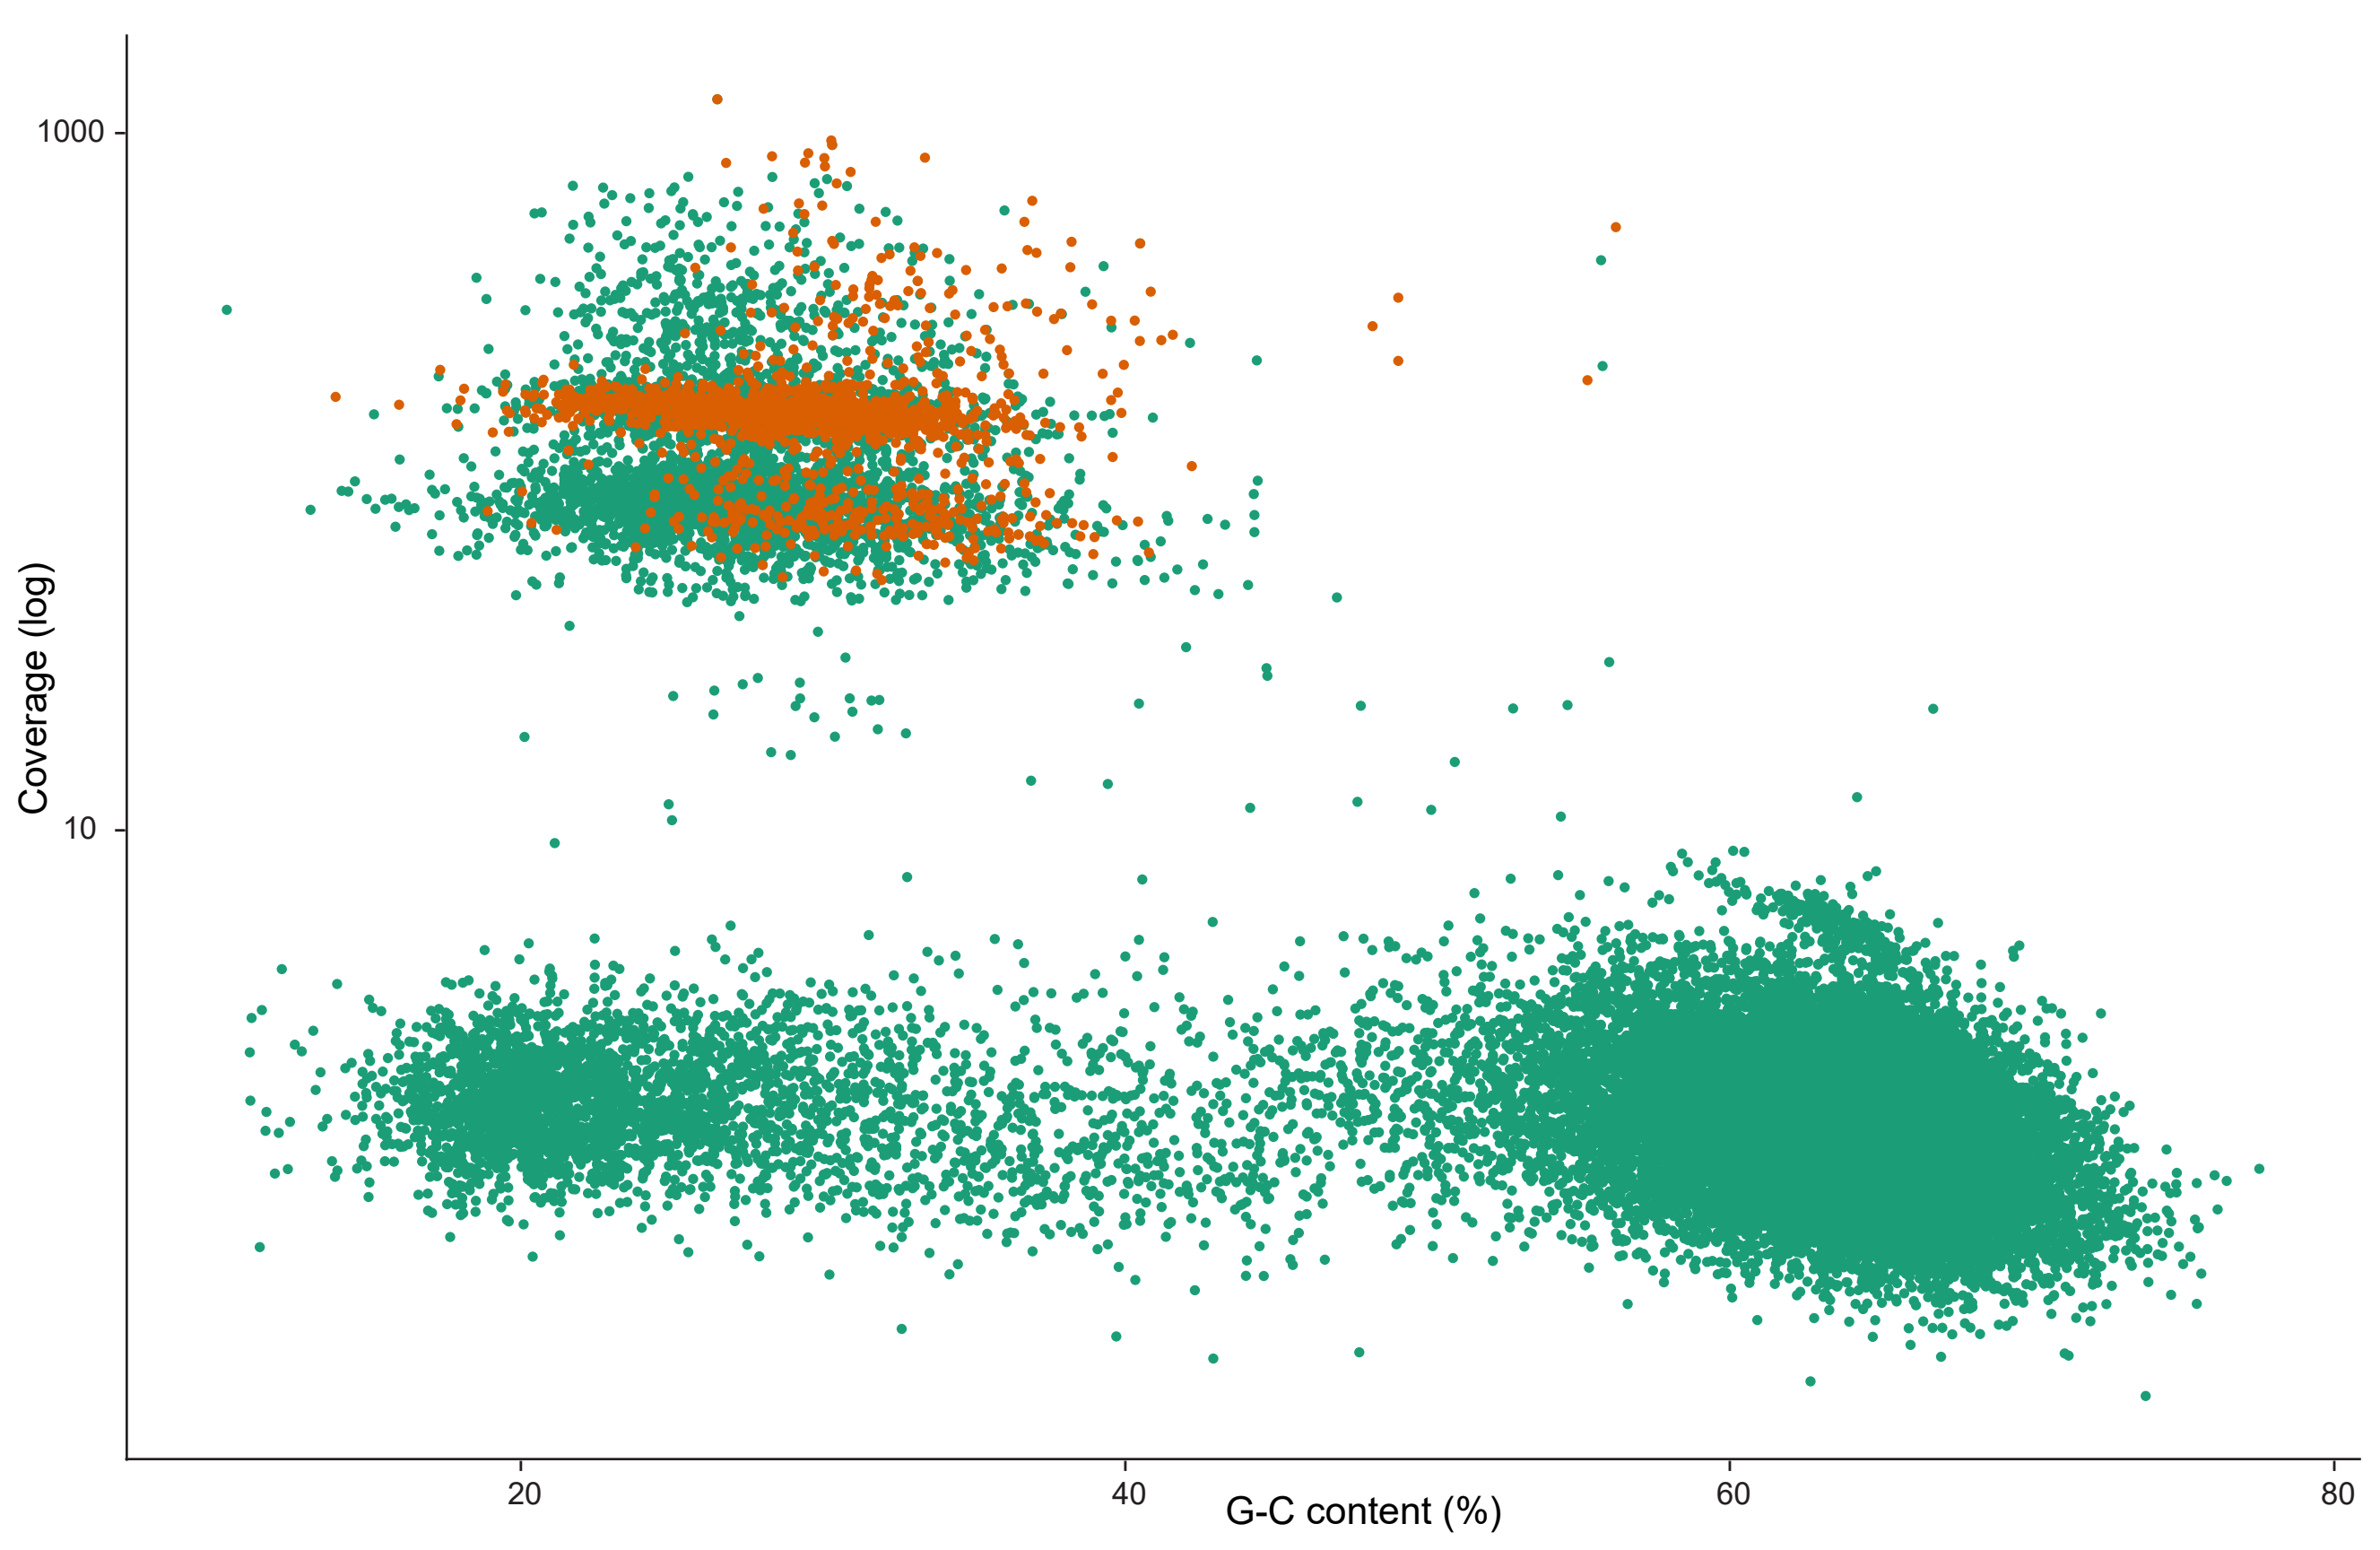

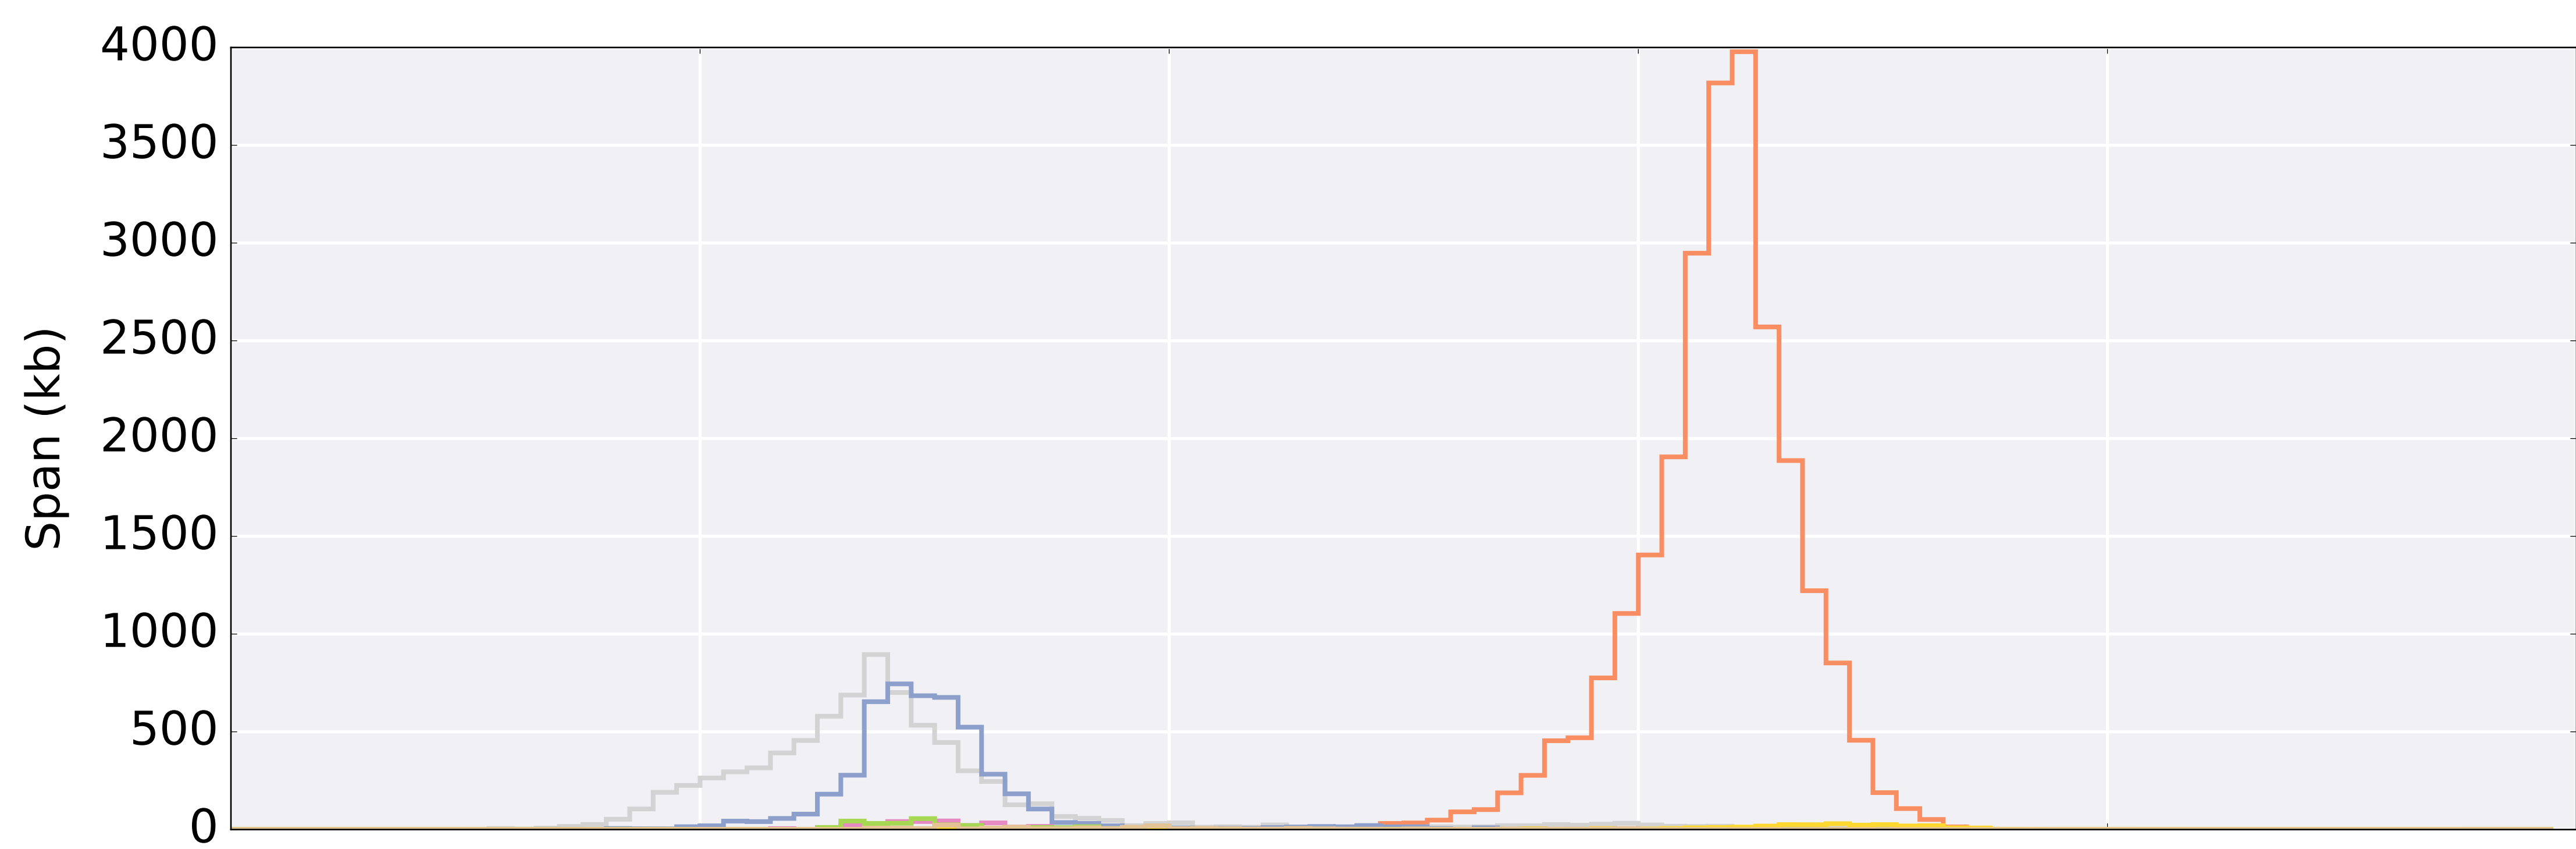

- Proteobacteria (20,491; 25.06MB; 1,283nt)
- no-hit (7,477; 7.70MB; 1,061nt)
- Microsporidia (1,833; 4.84MB; 5,865nt)
- Arthropoda (158; 0.31MB; 3,038nt)
- Cnidaria (93; 0.28MB; 7,295nt)
- Actinobacteria (384; 0.27MB; 646nt)
- Chordata (183; 0.20MB; 1,120nt)

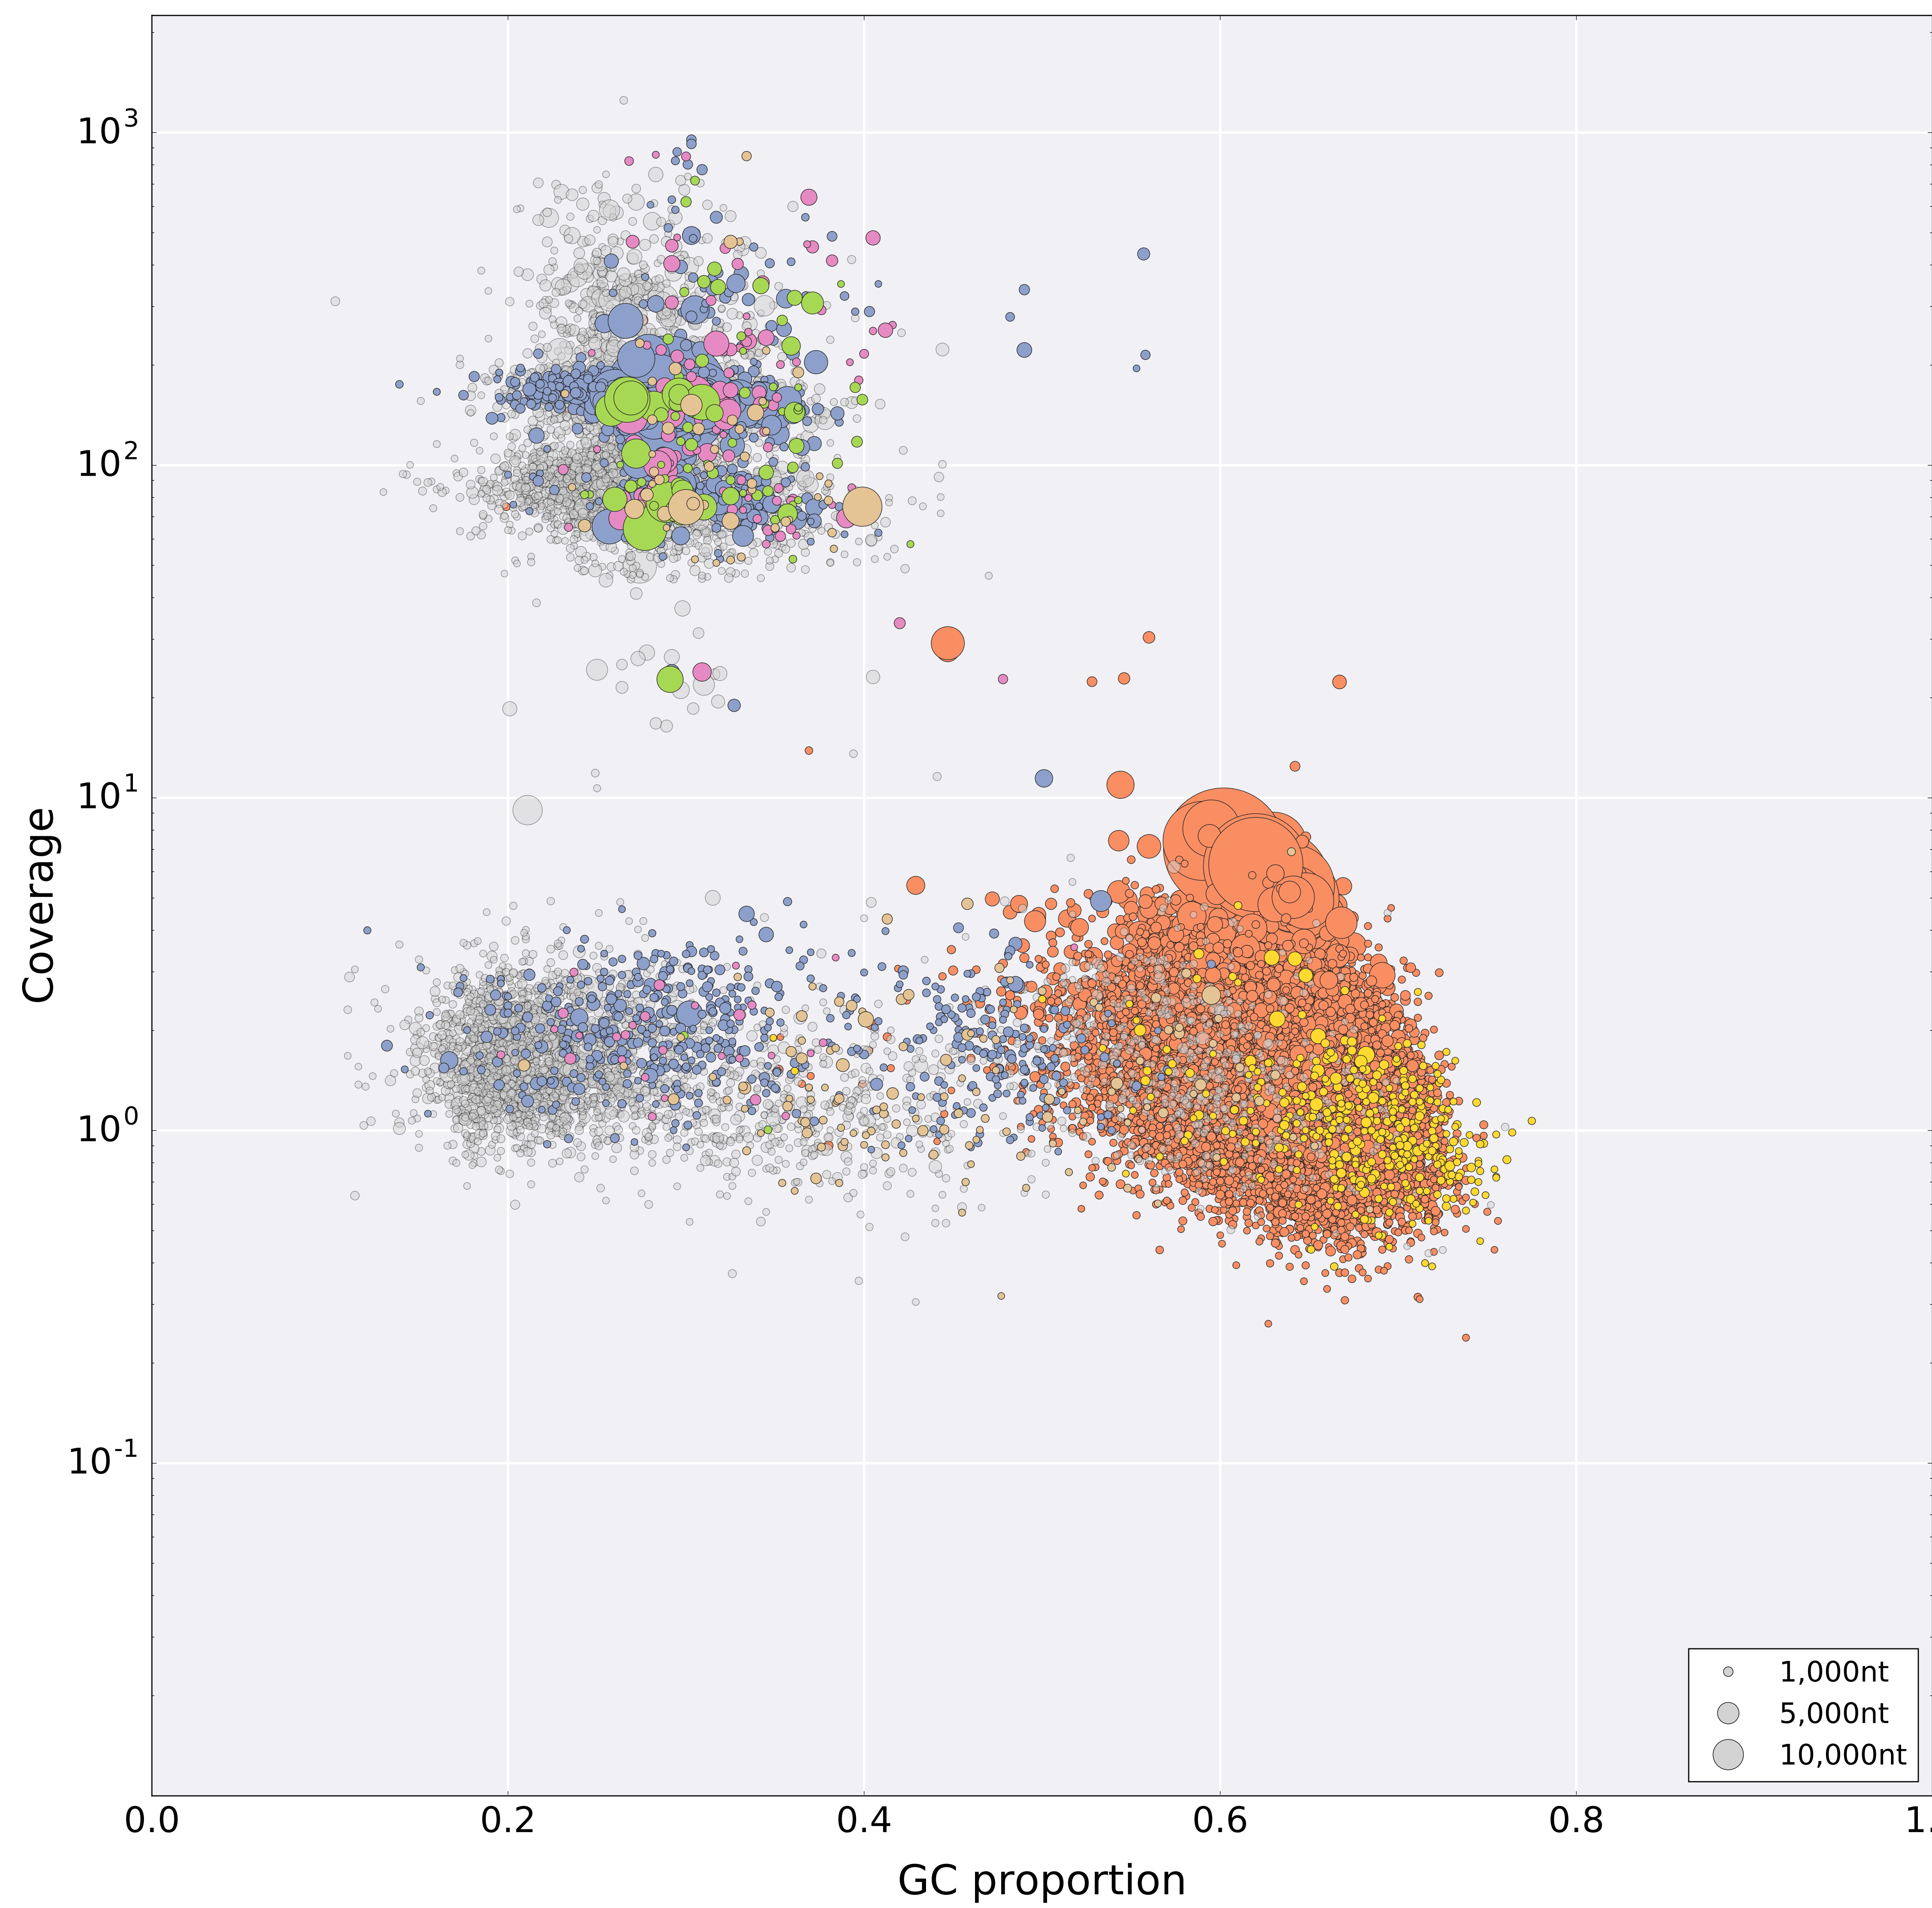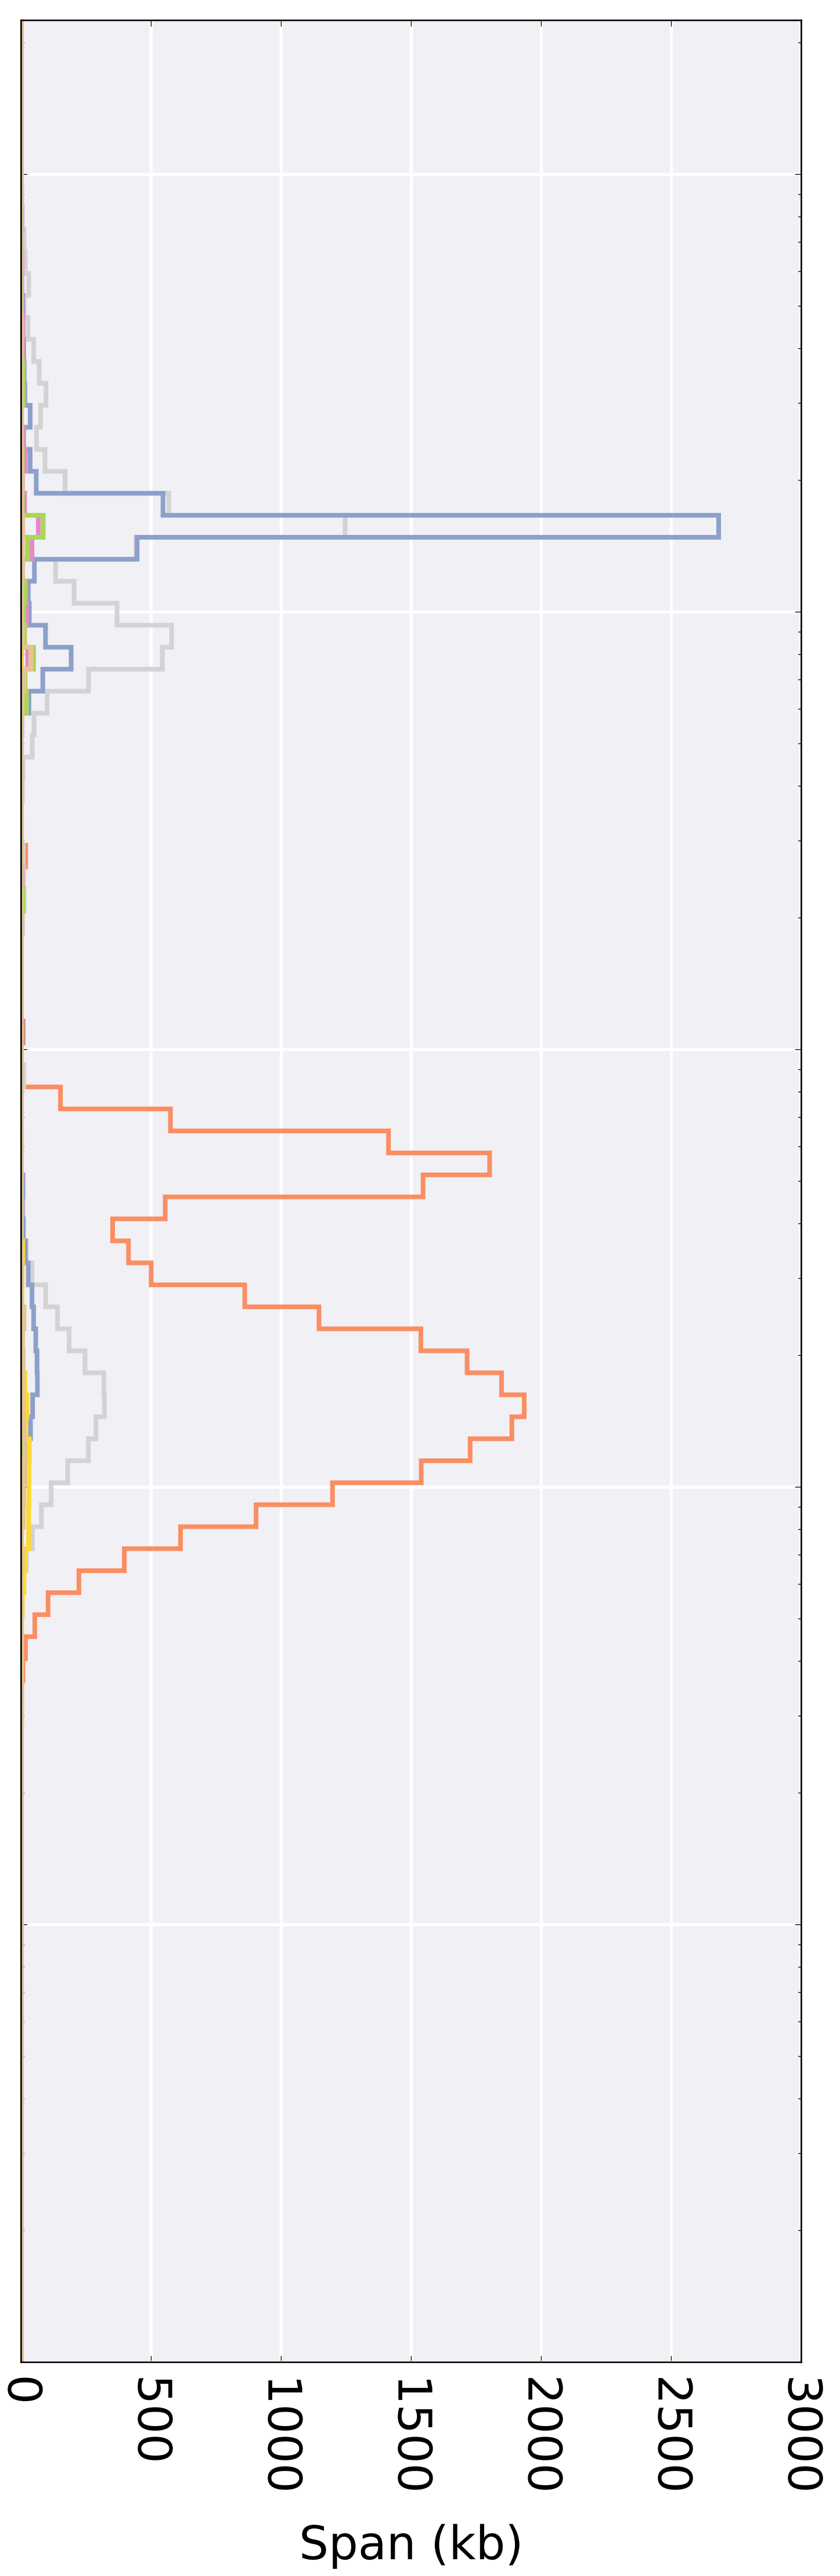



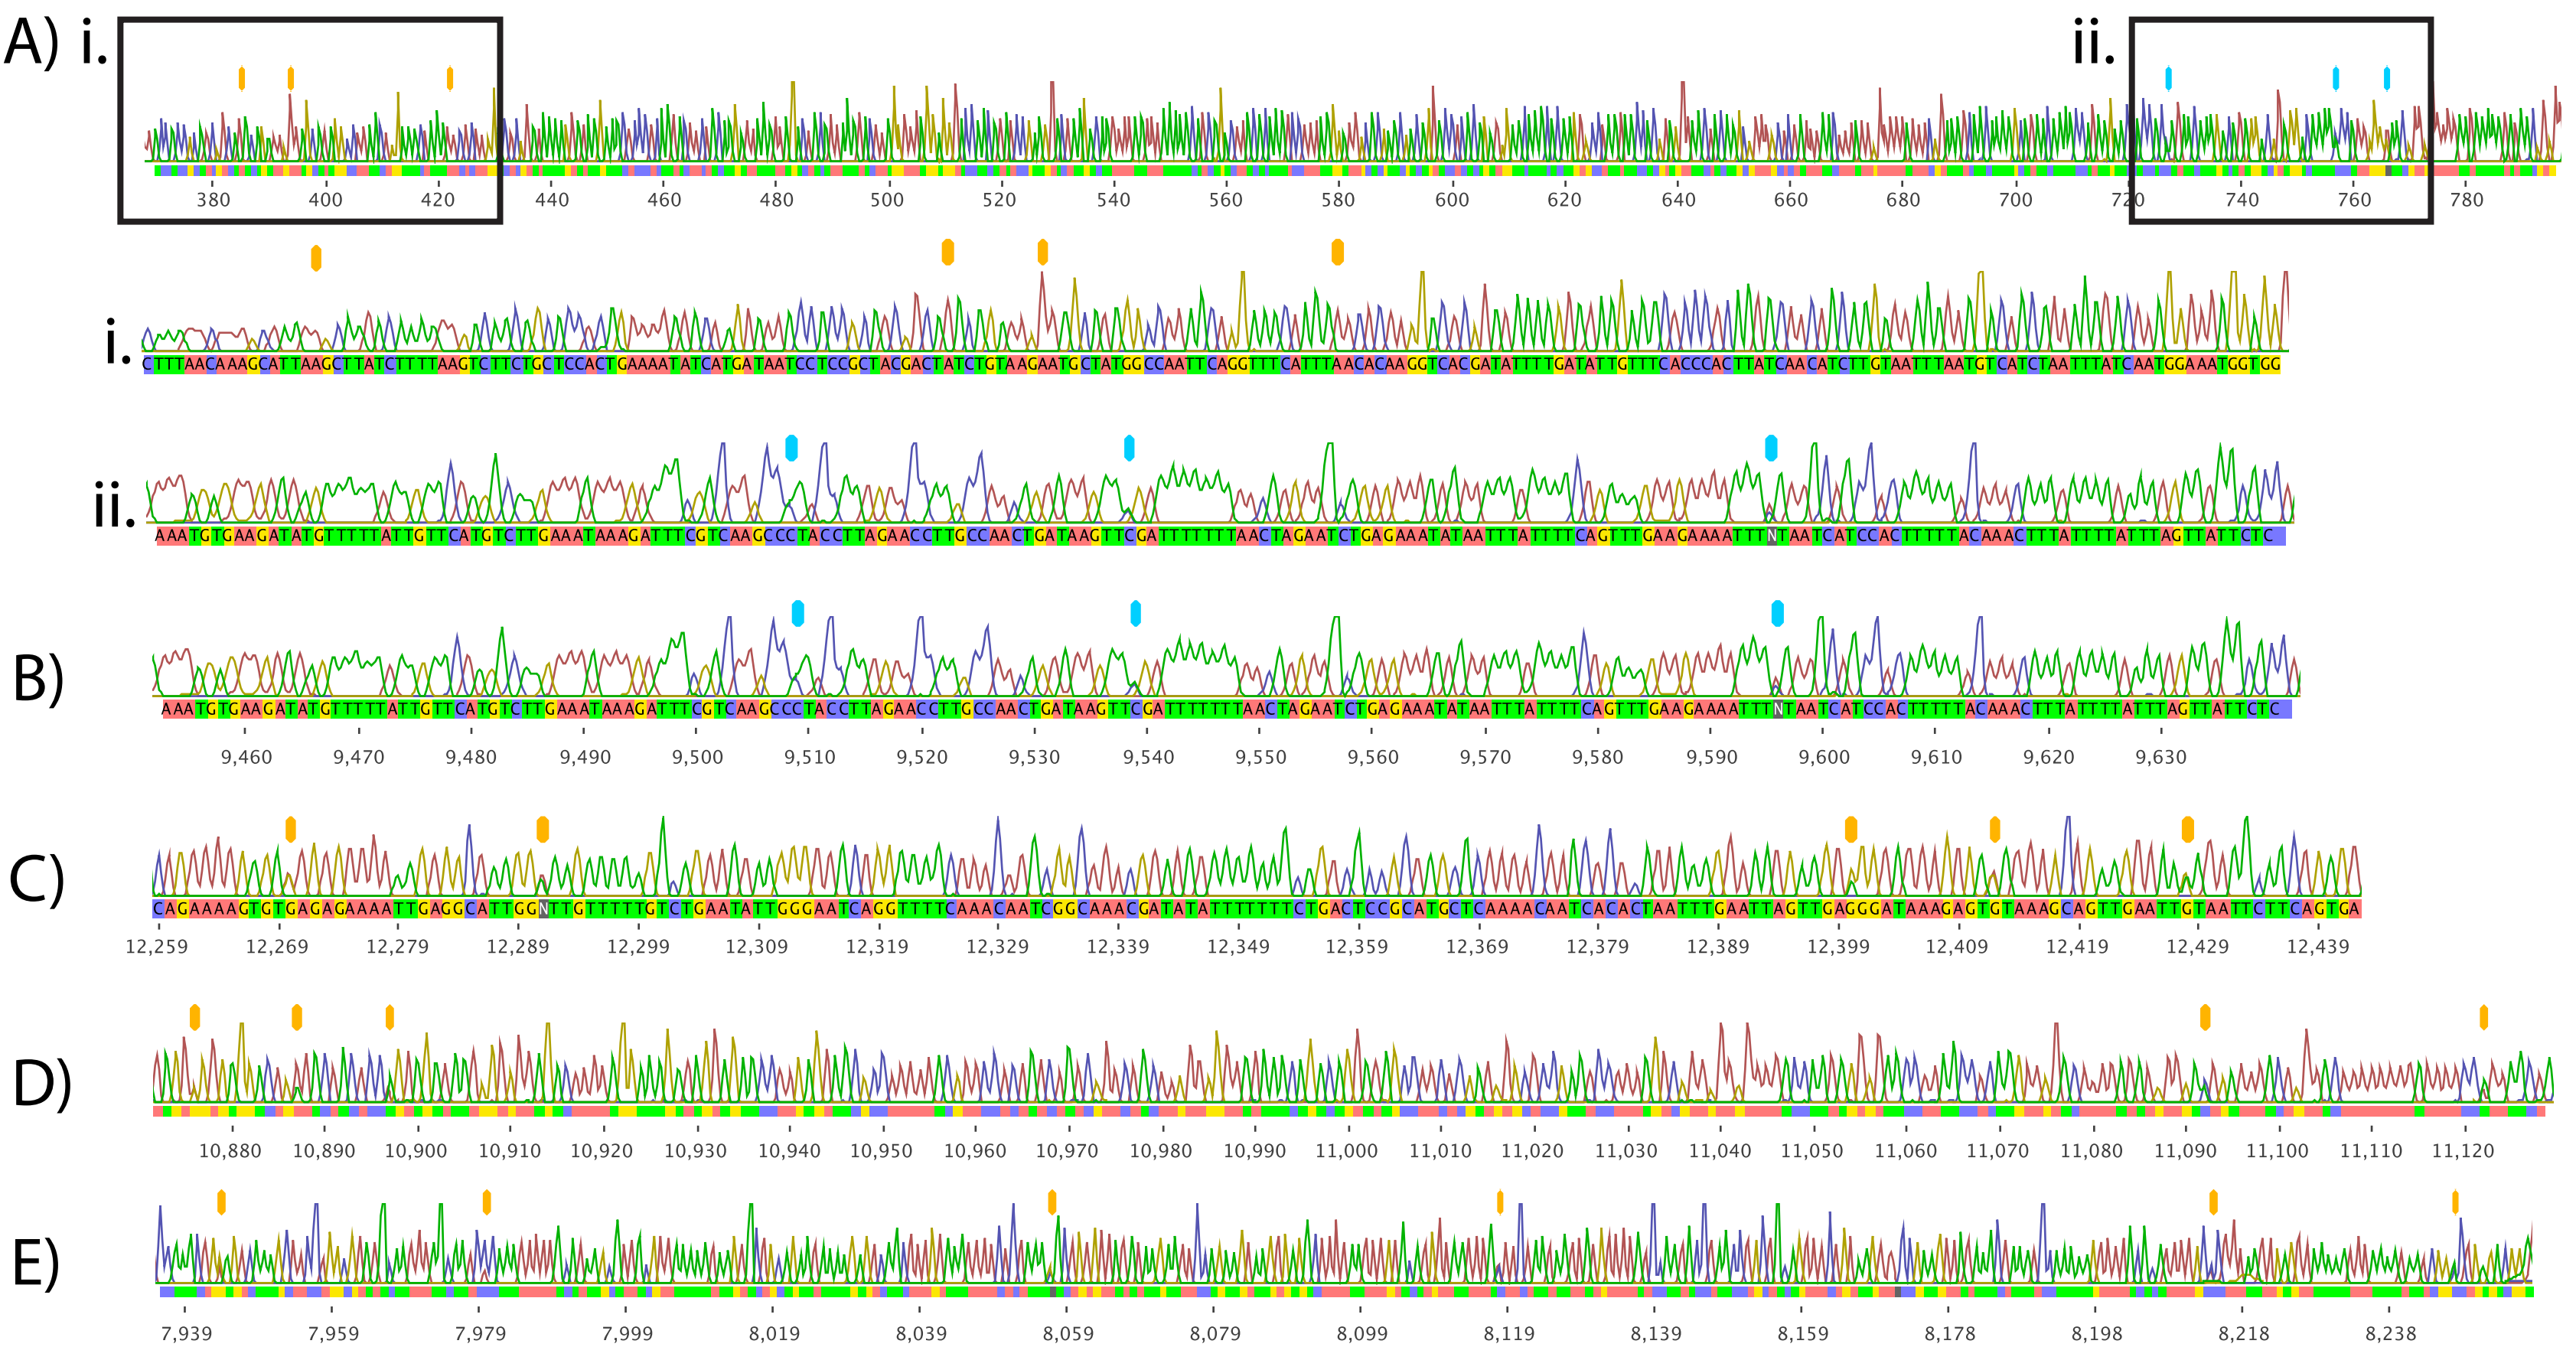

**(A)**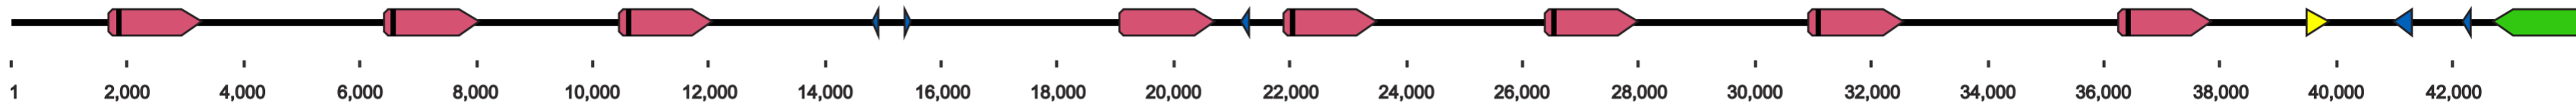**(B)**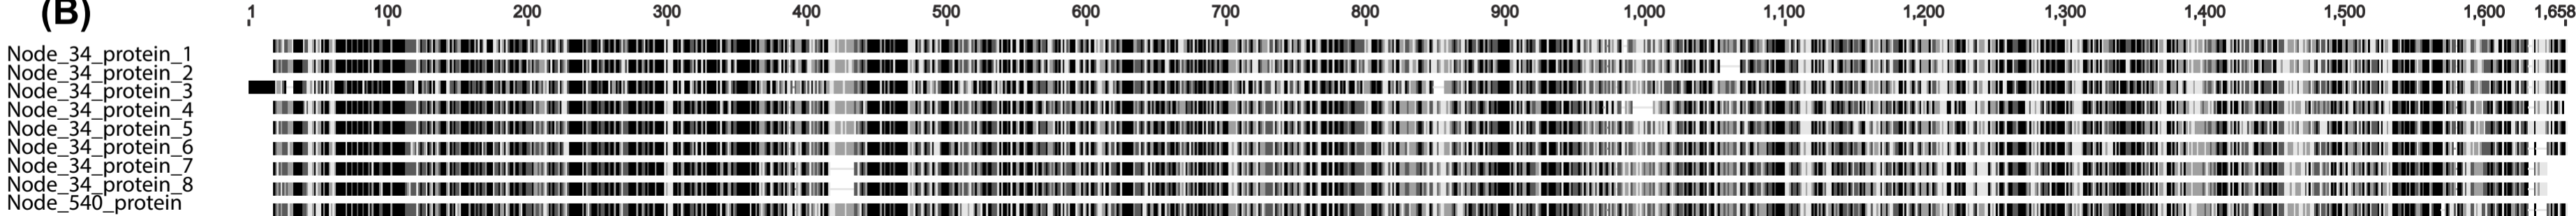



**A.***Vavraia culicis floridensis**Pseudoloma neurophilia**Trachipleistophora hominis*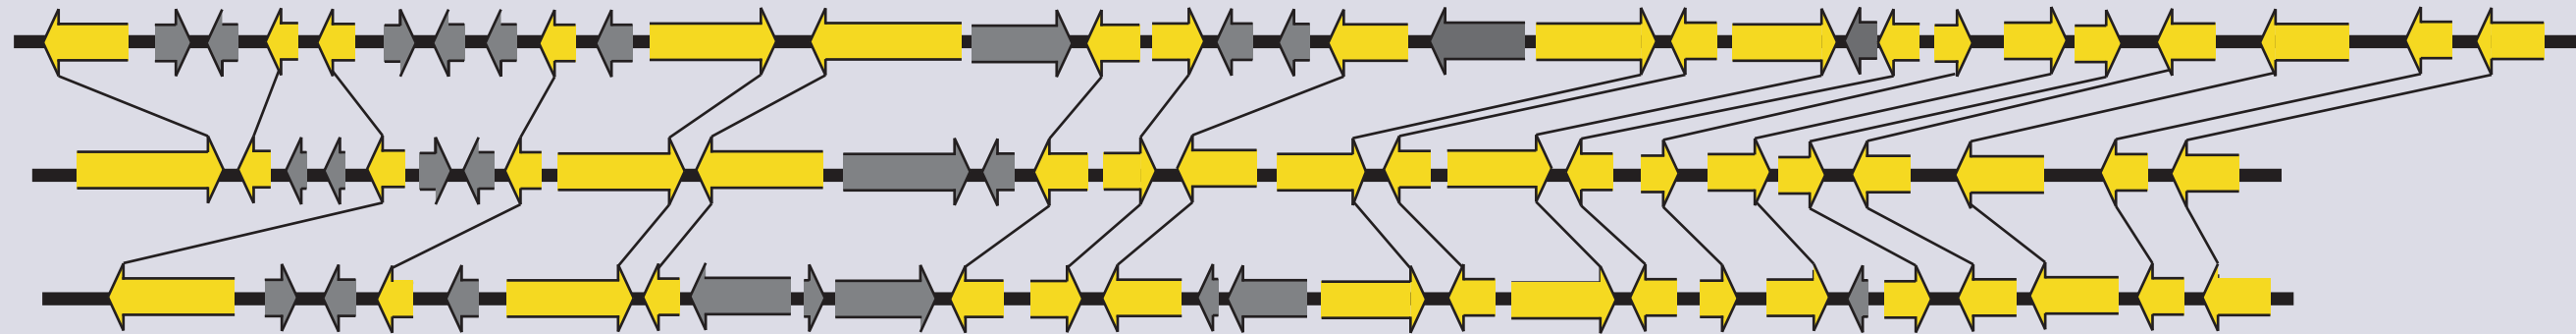**B.***Vavraia culicis floridensis**Pseudoloma neurophilia**Trachipleistophora hominis*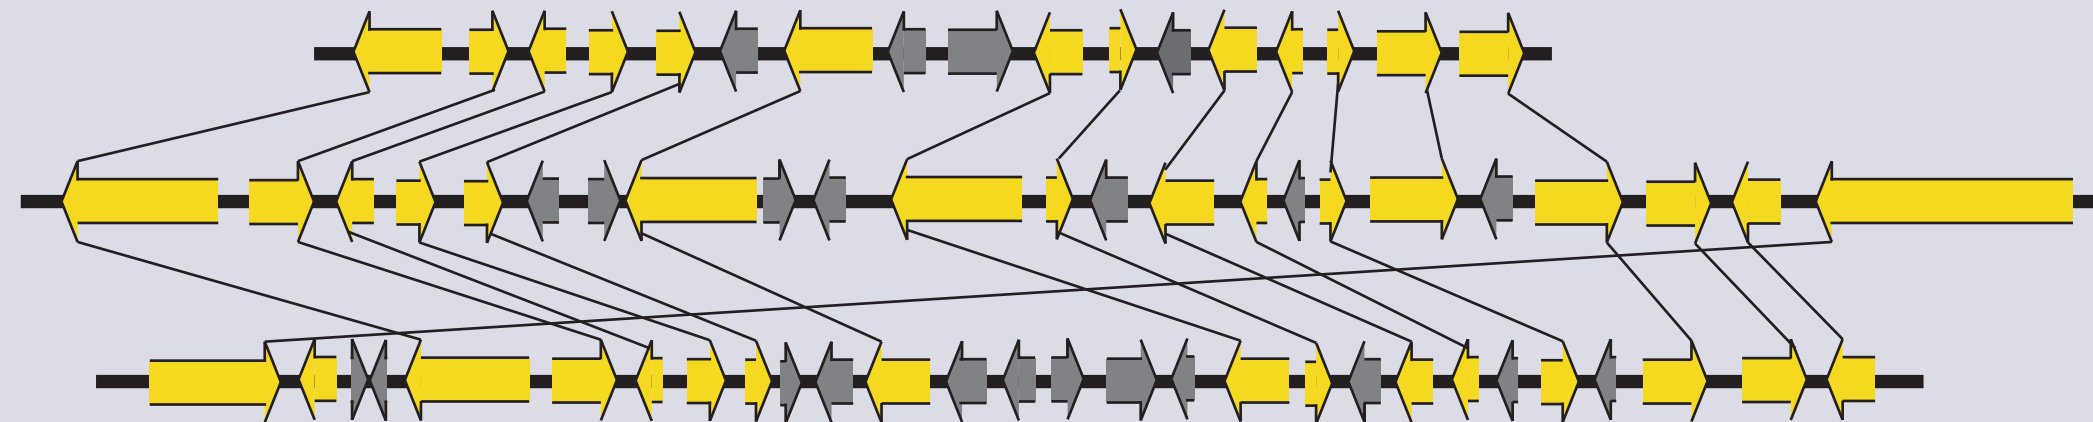

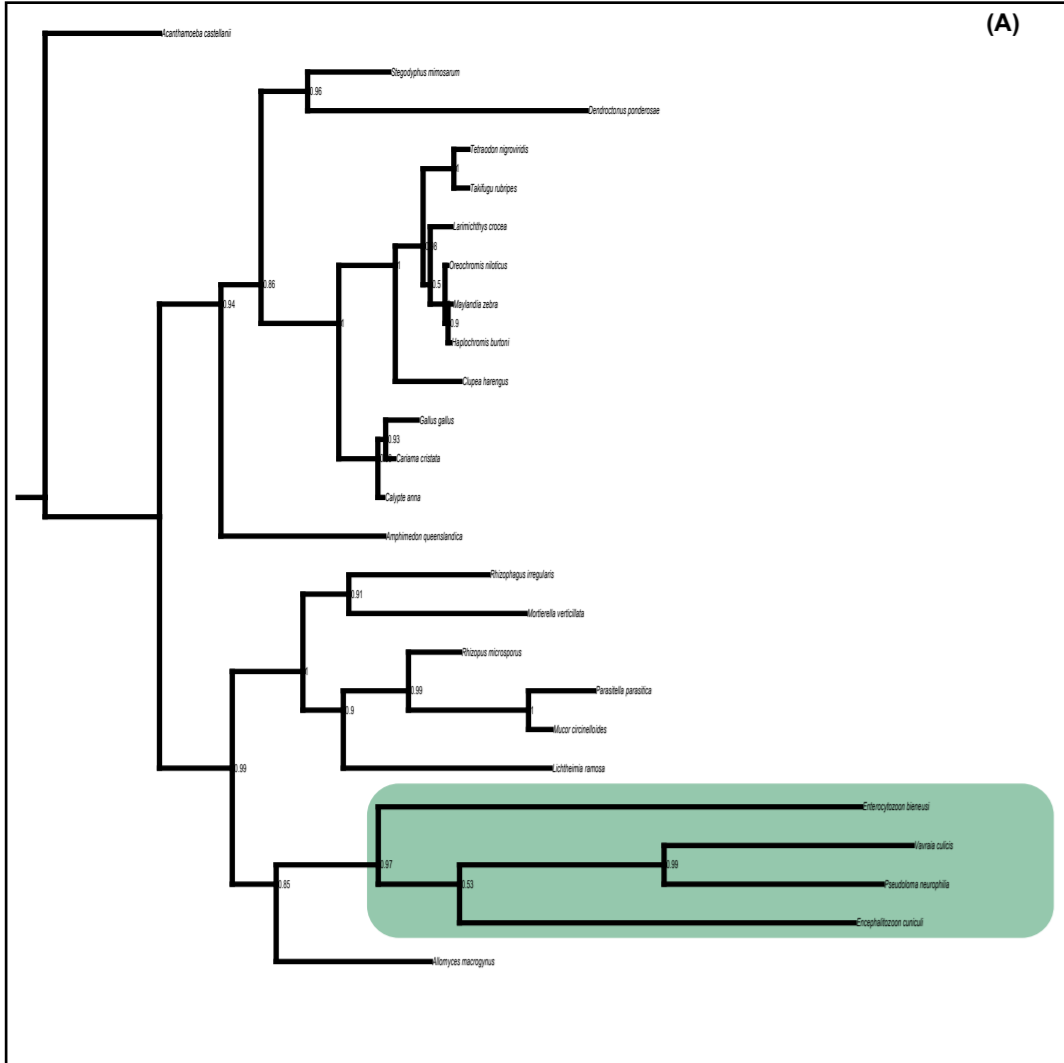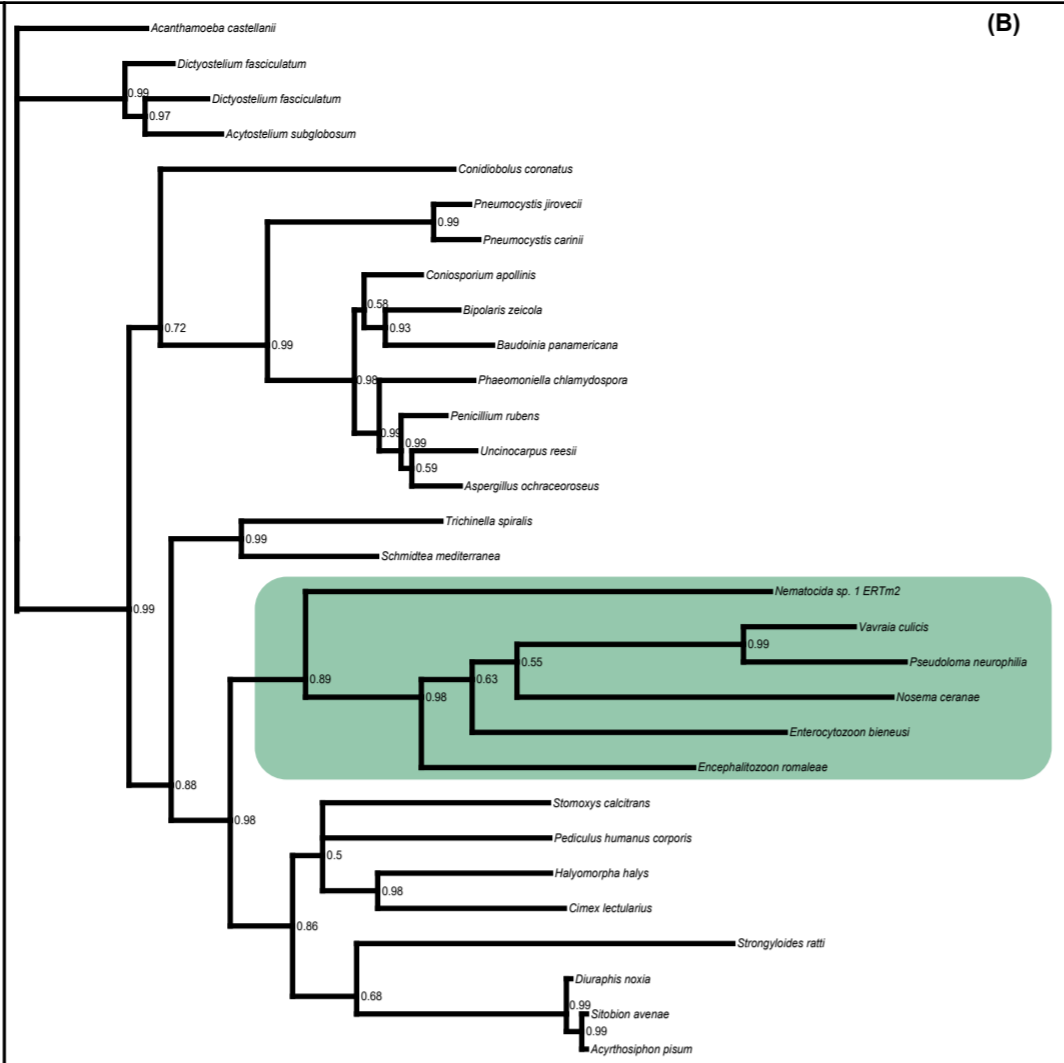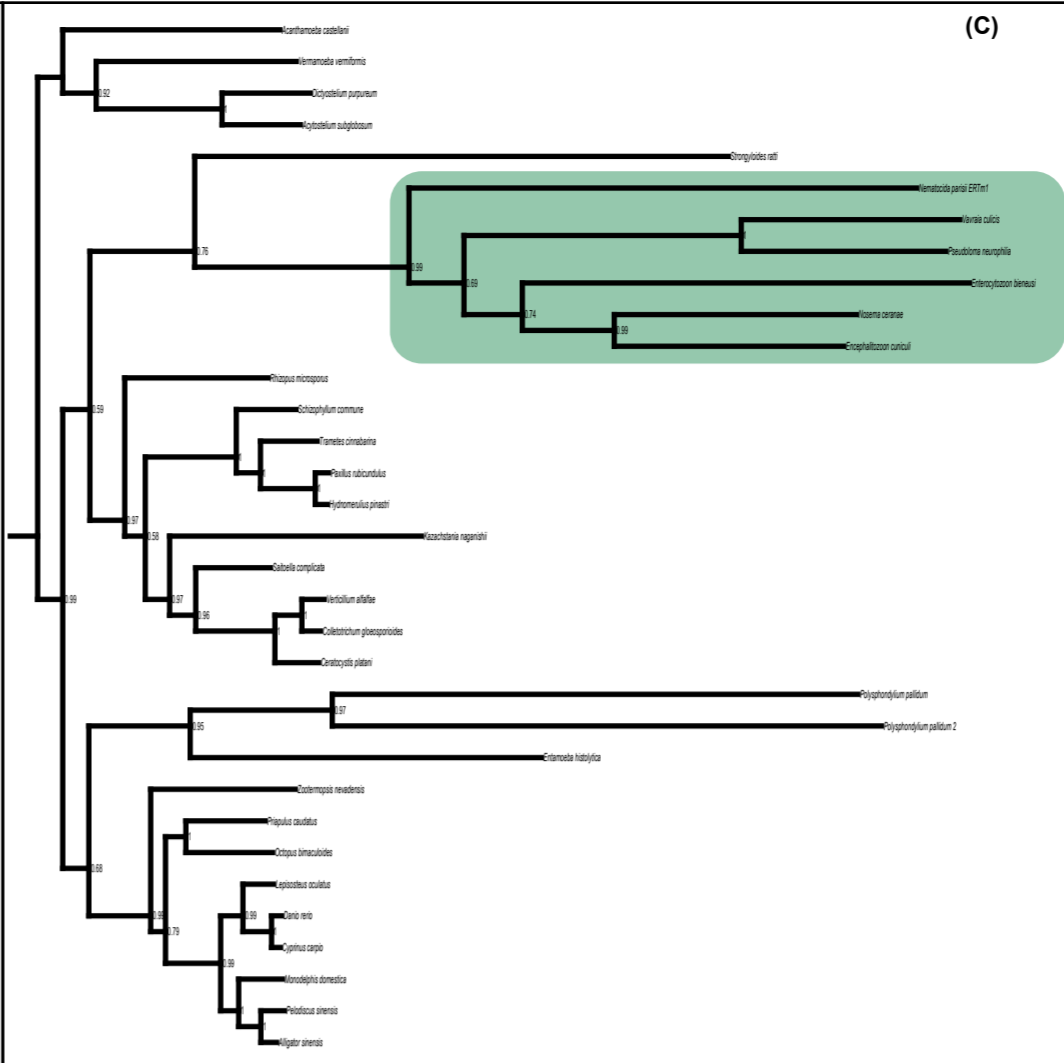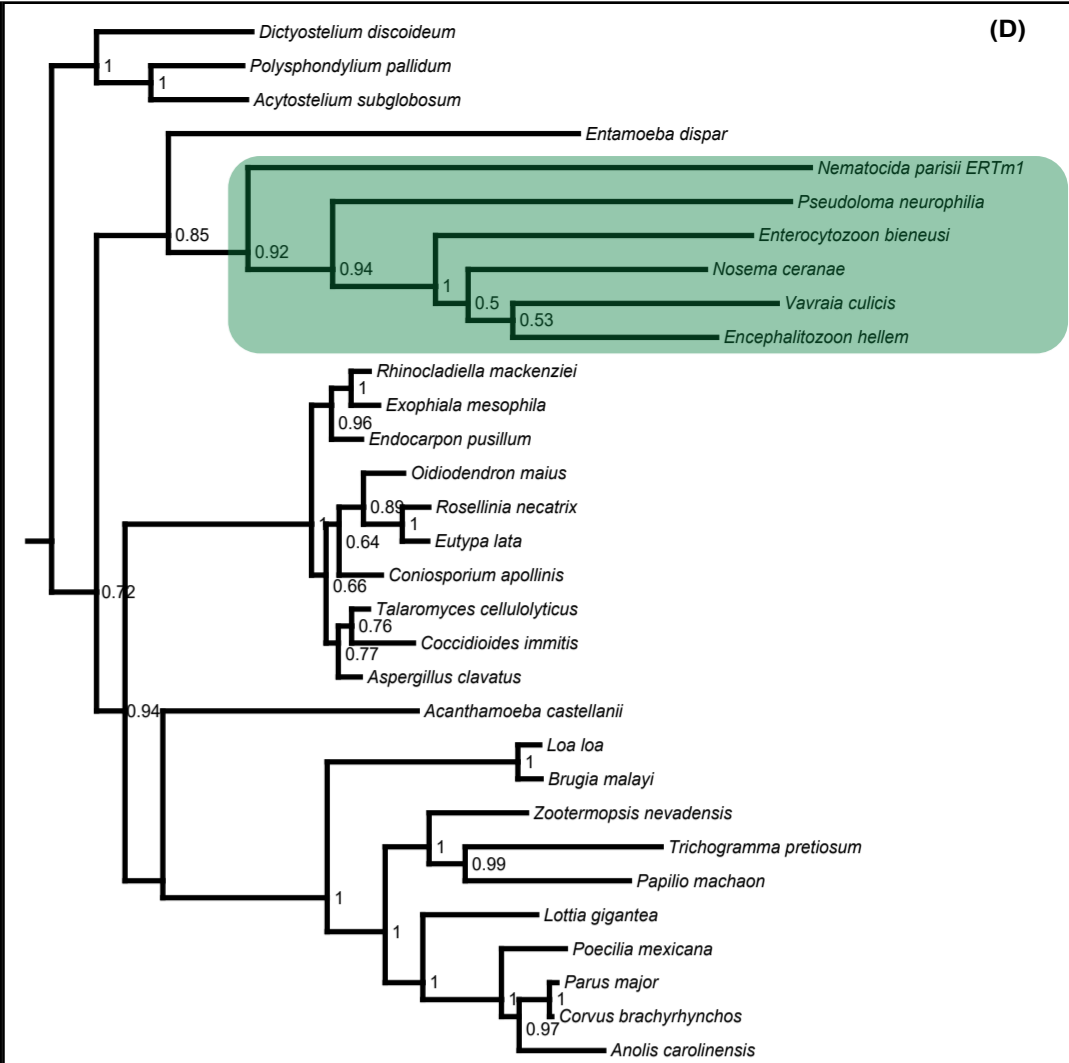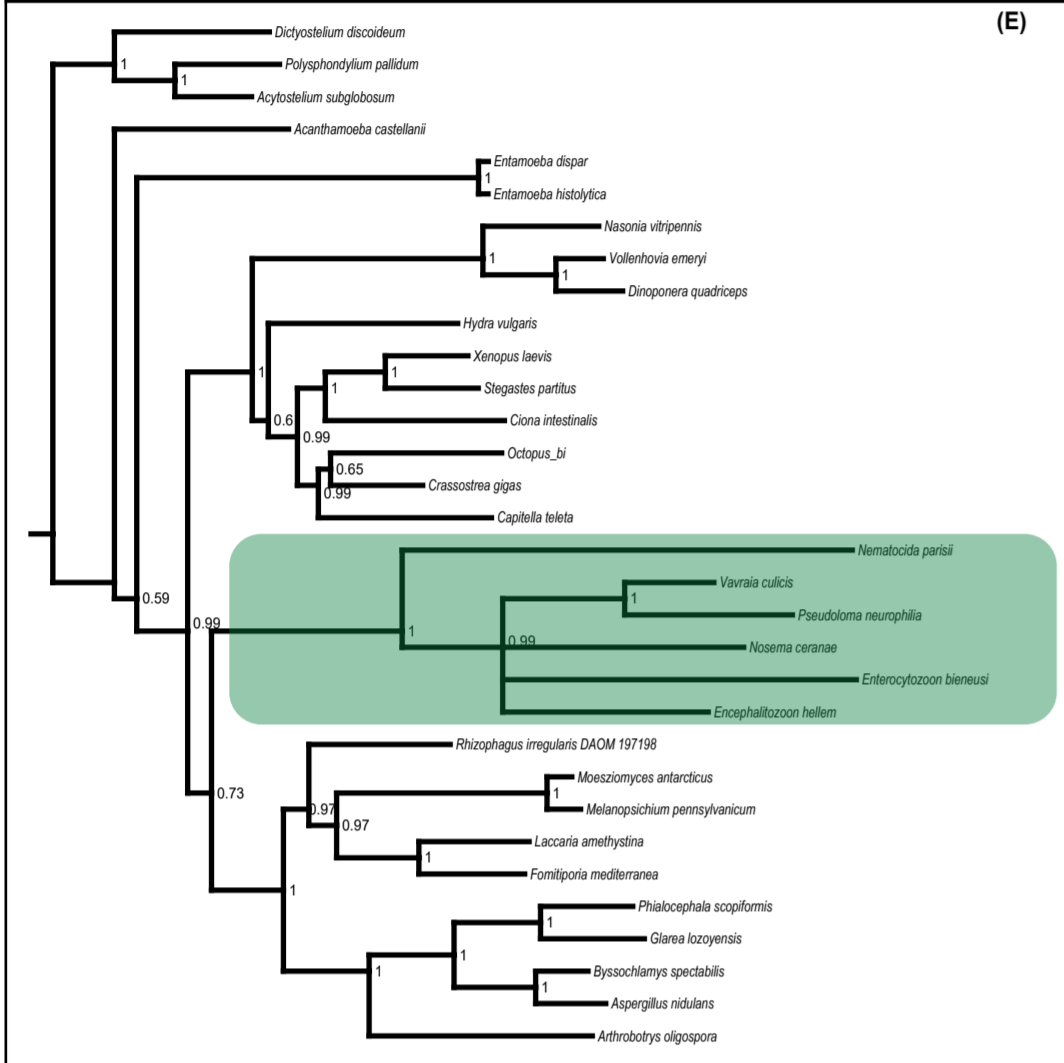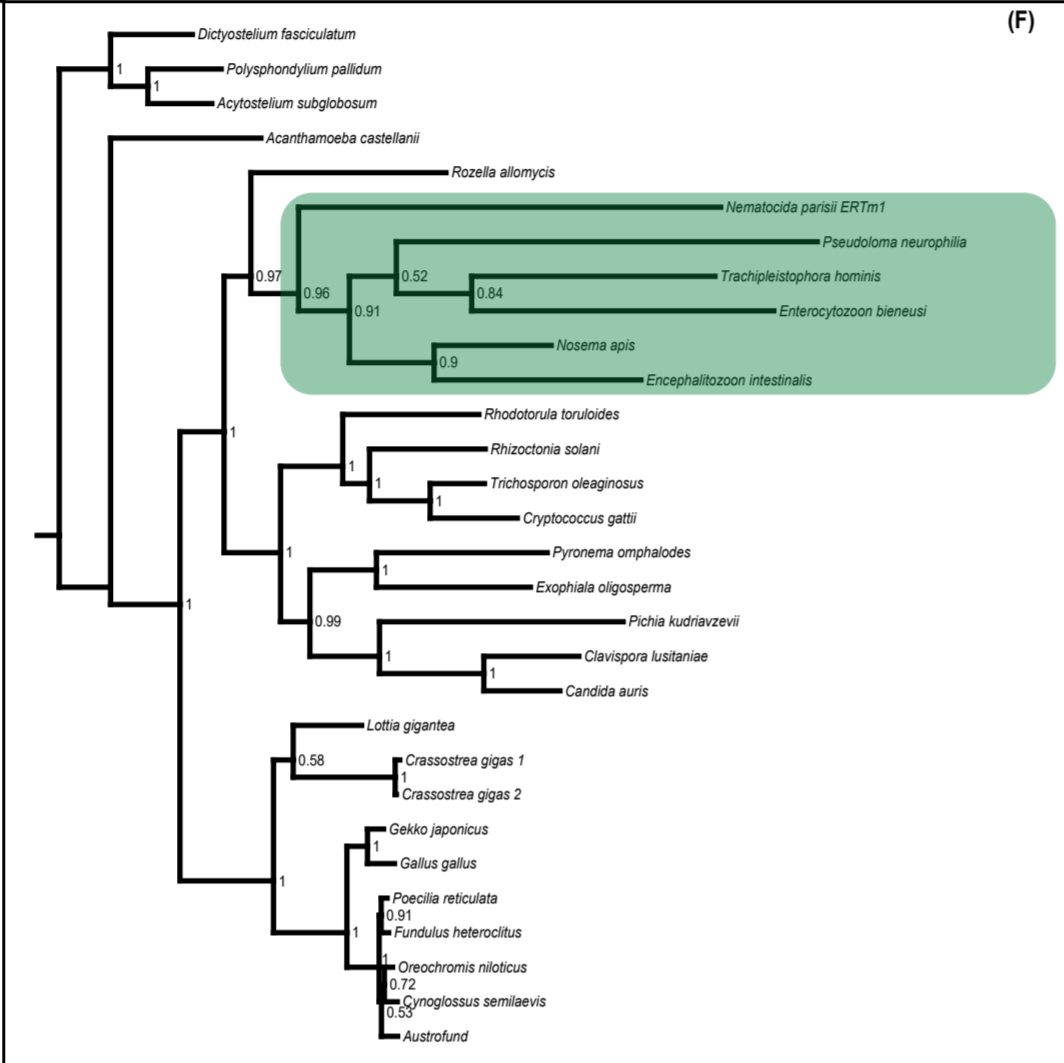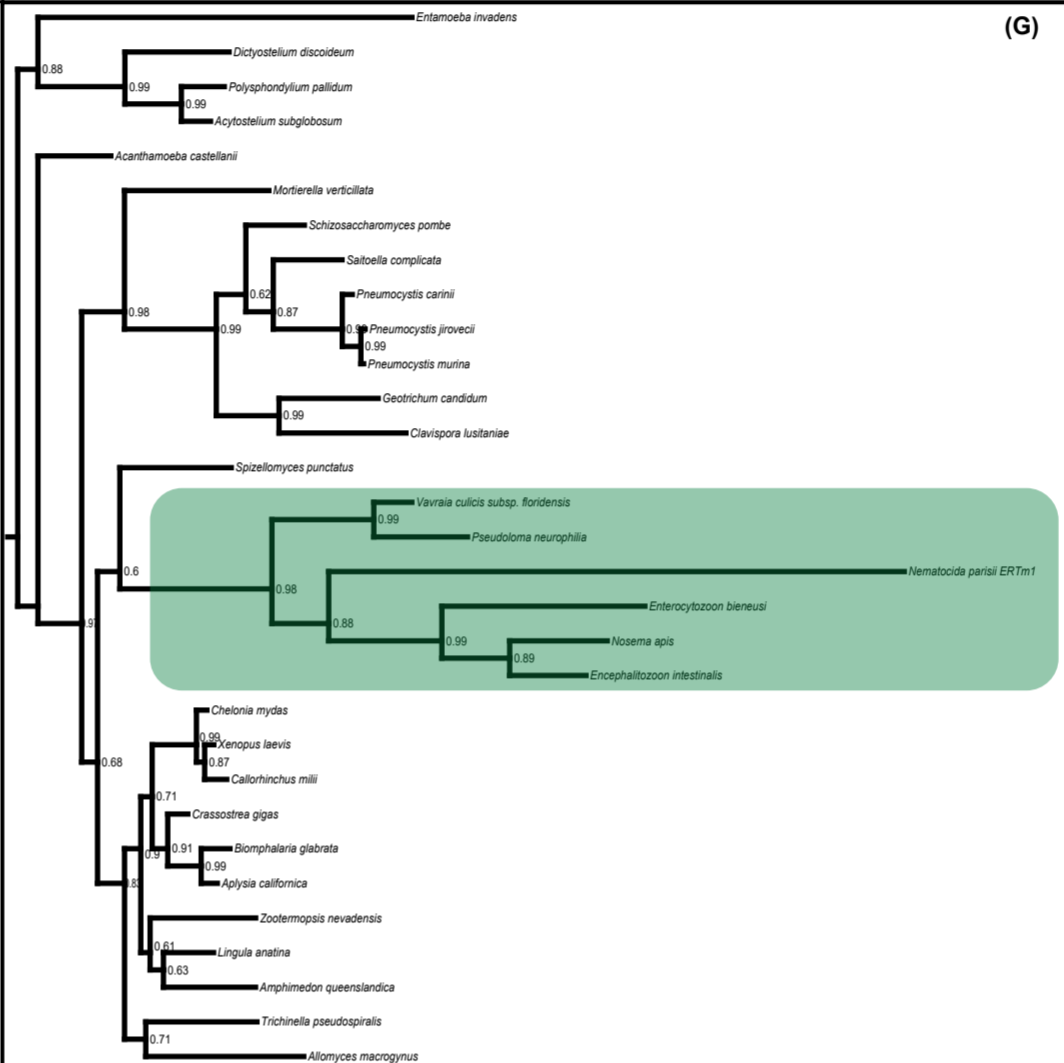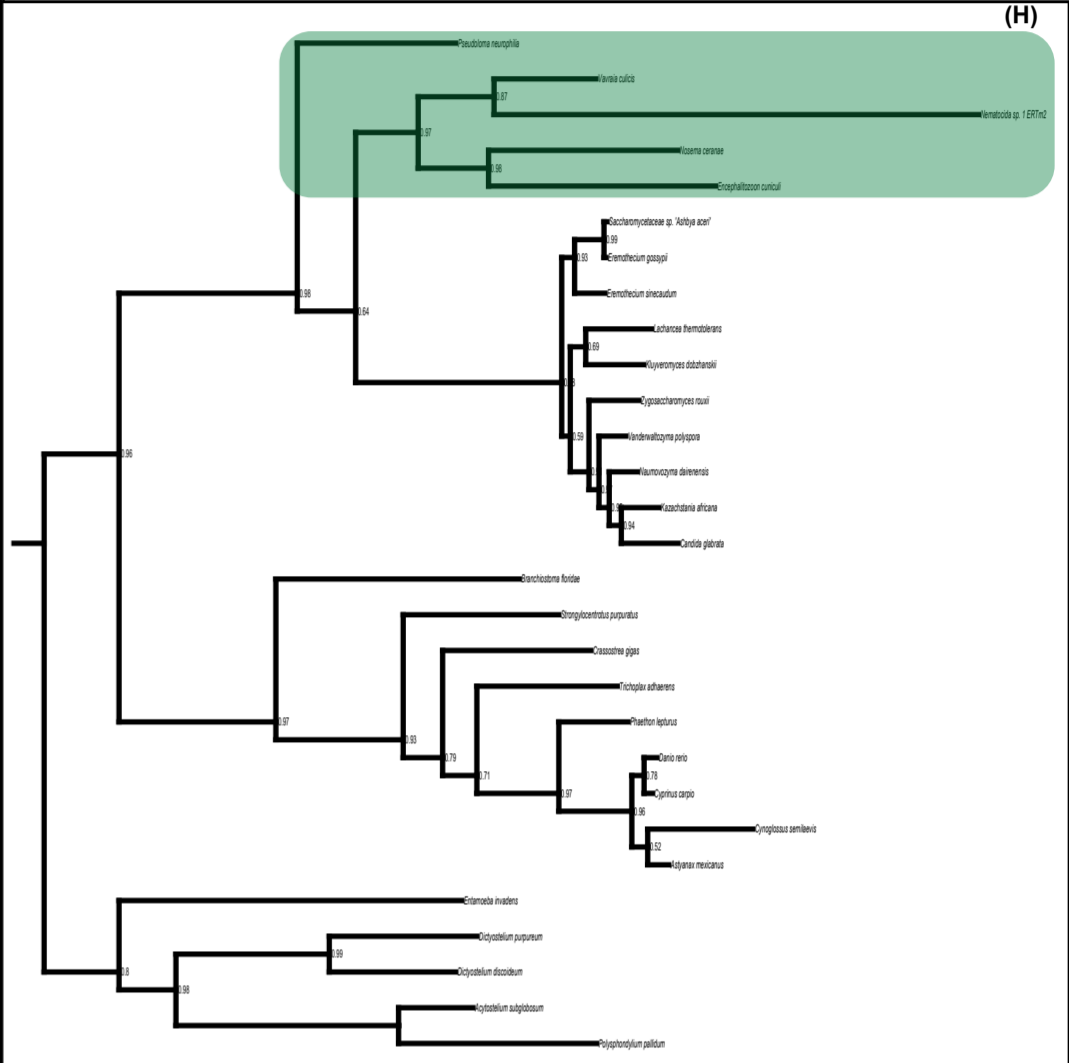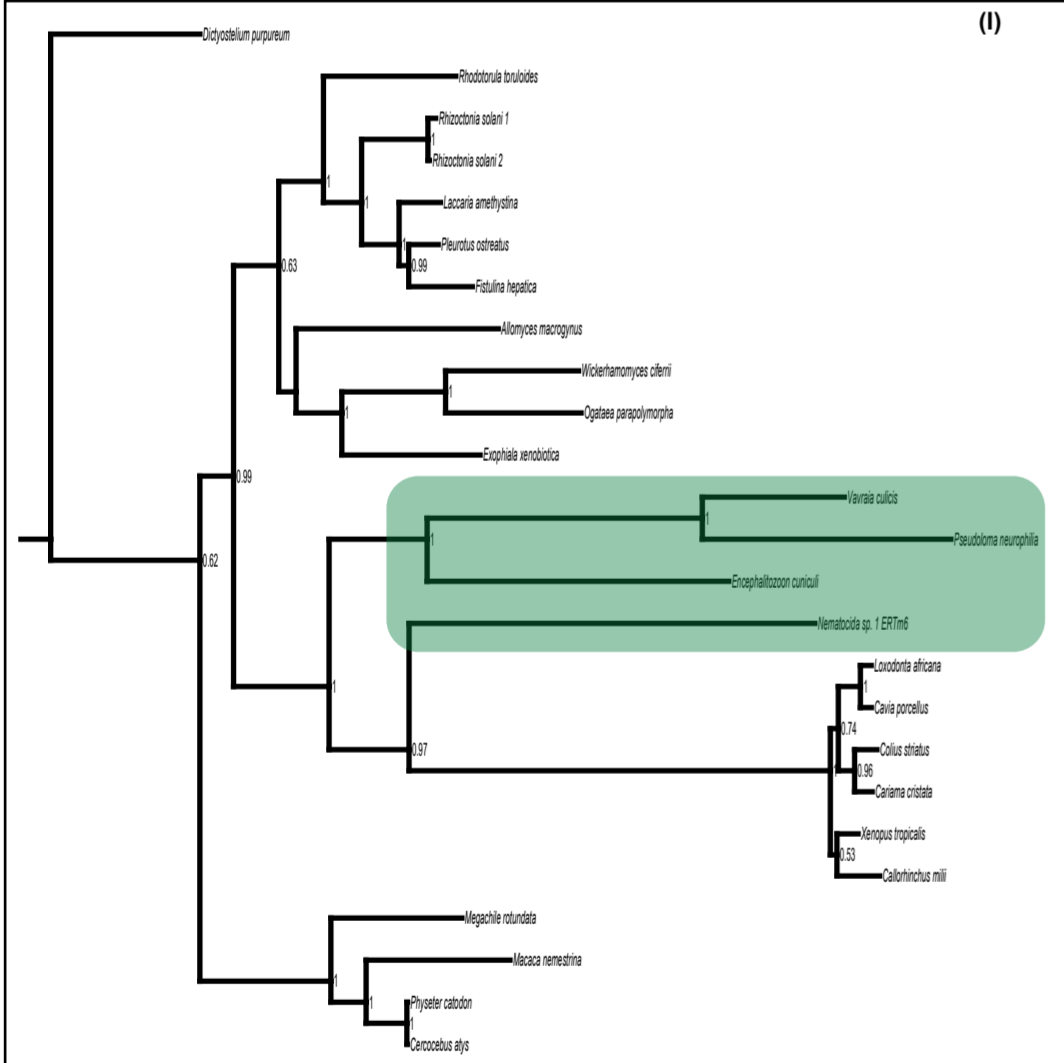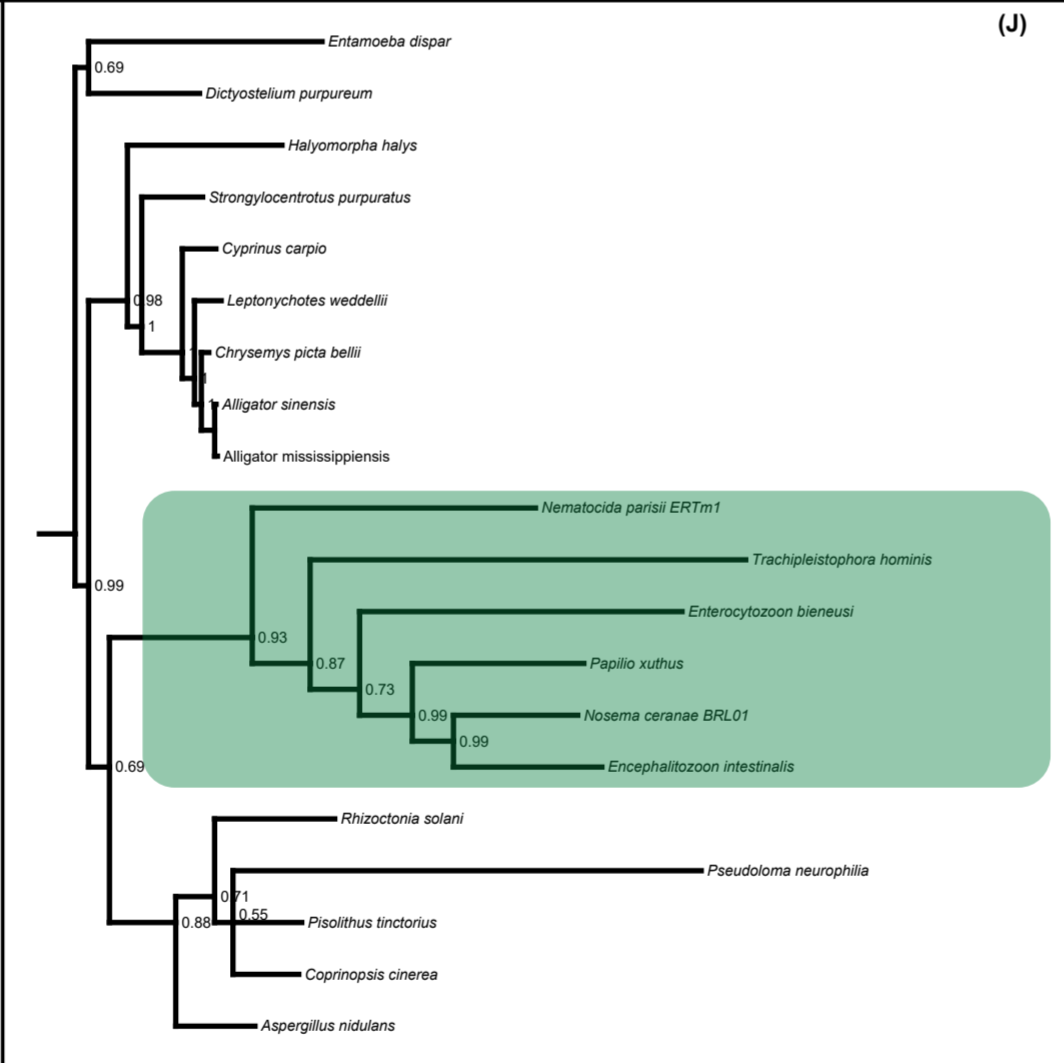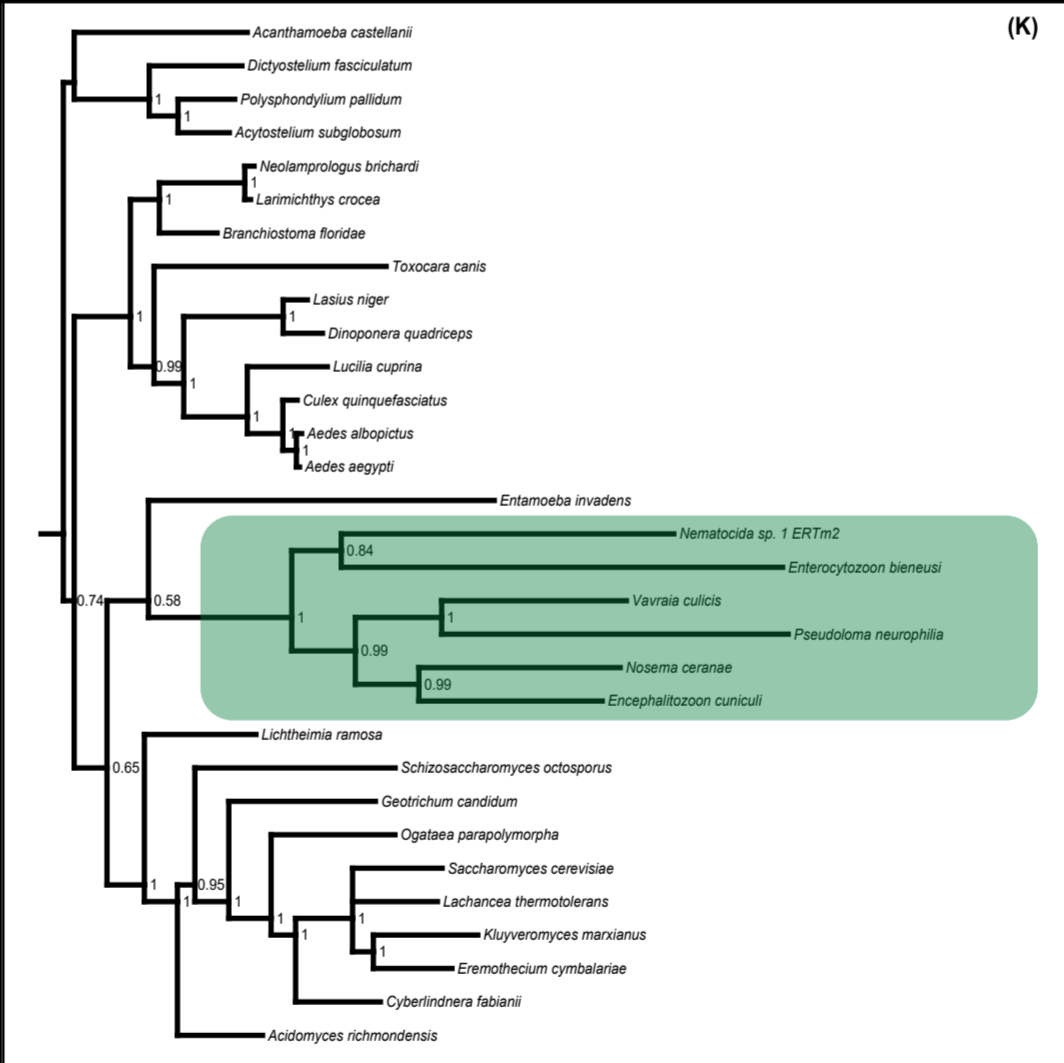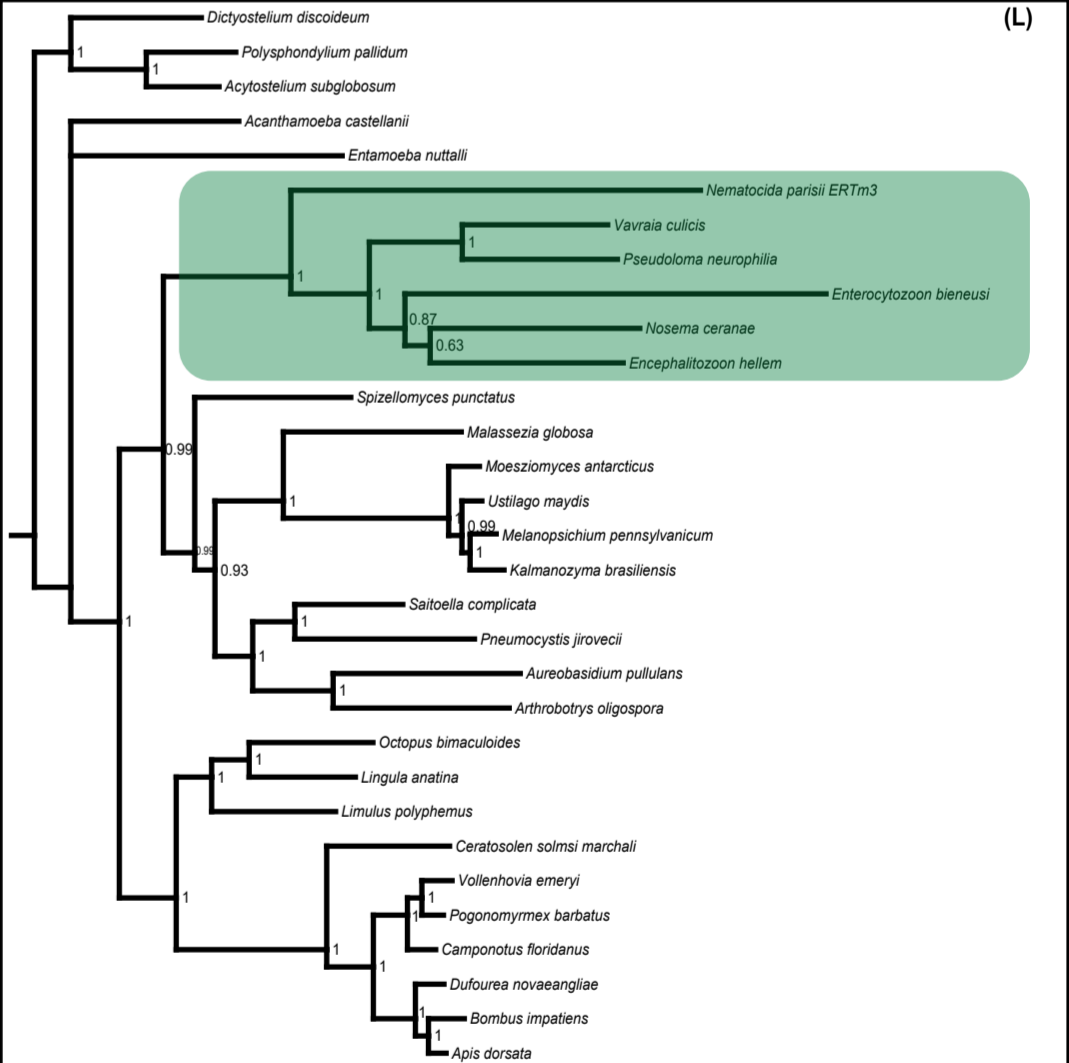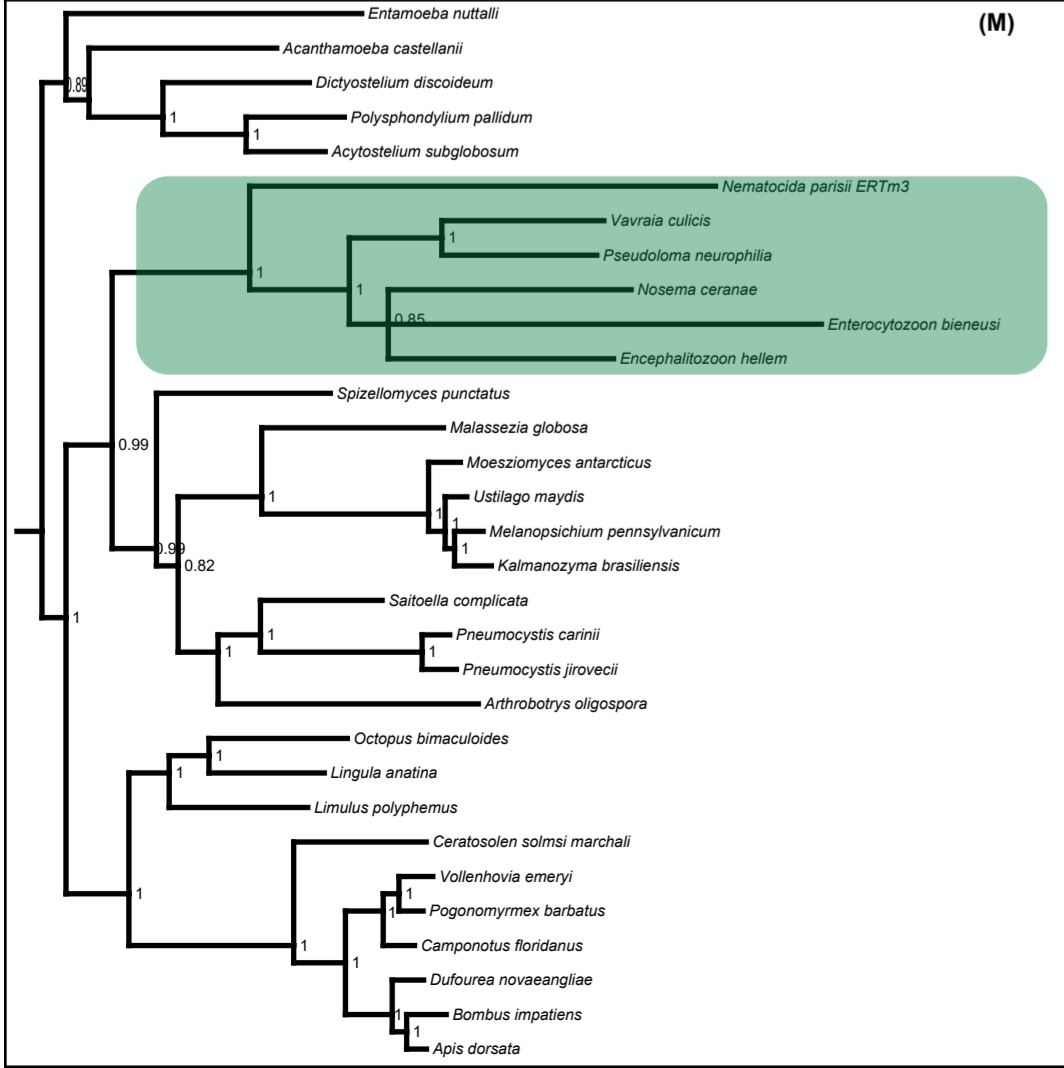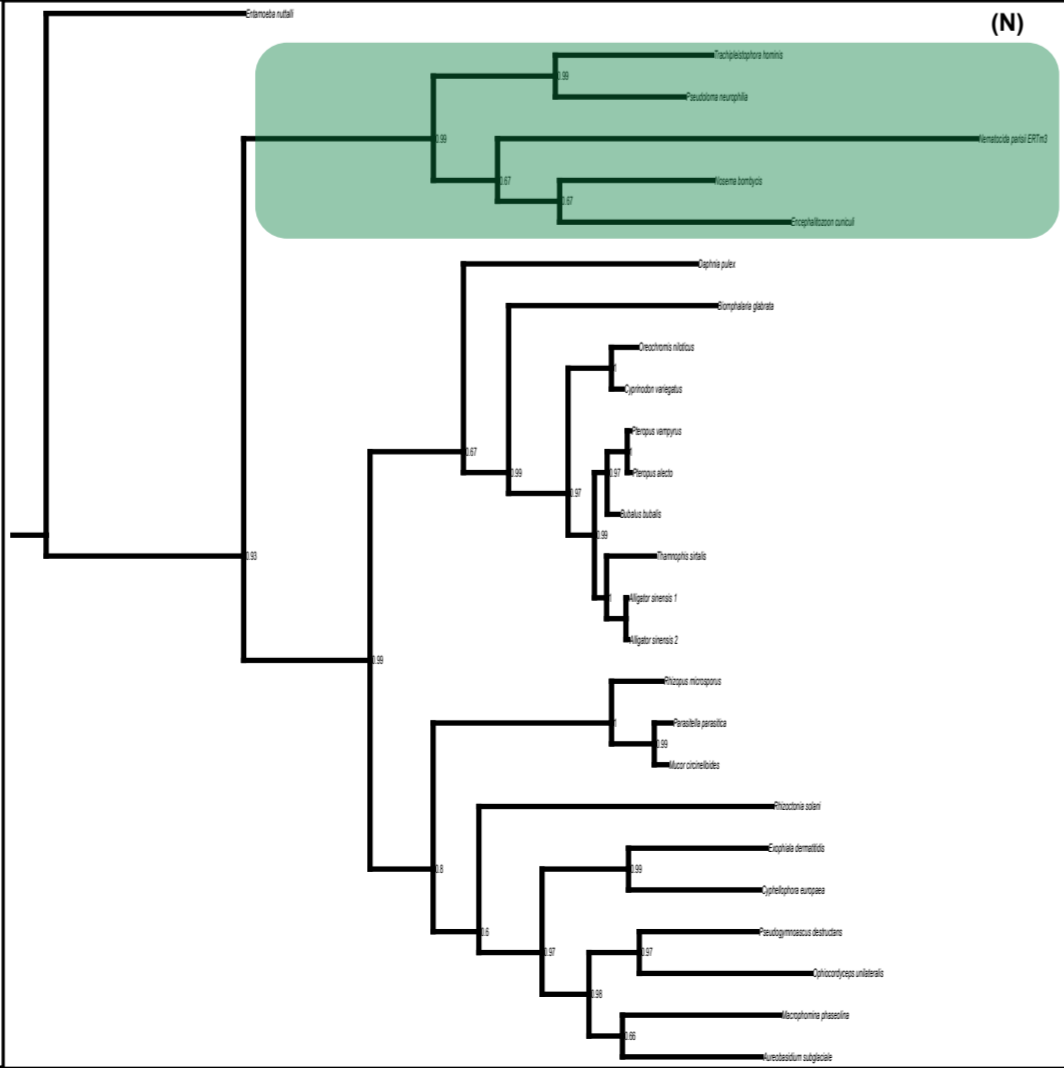





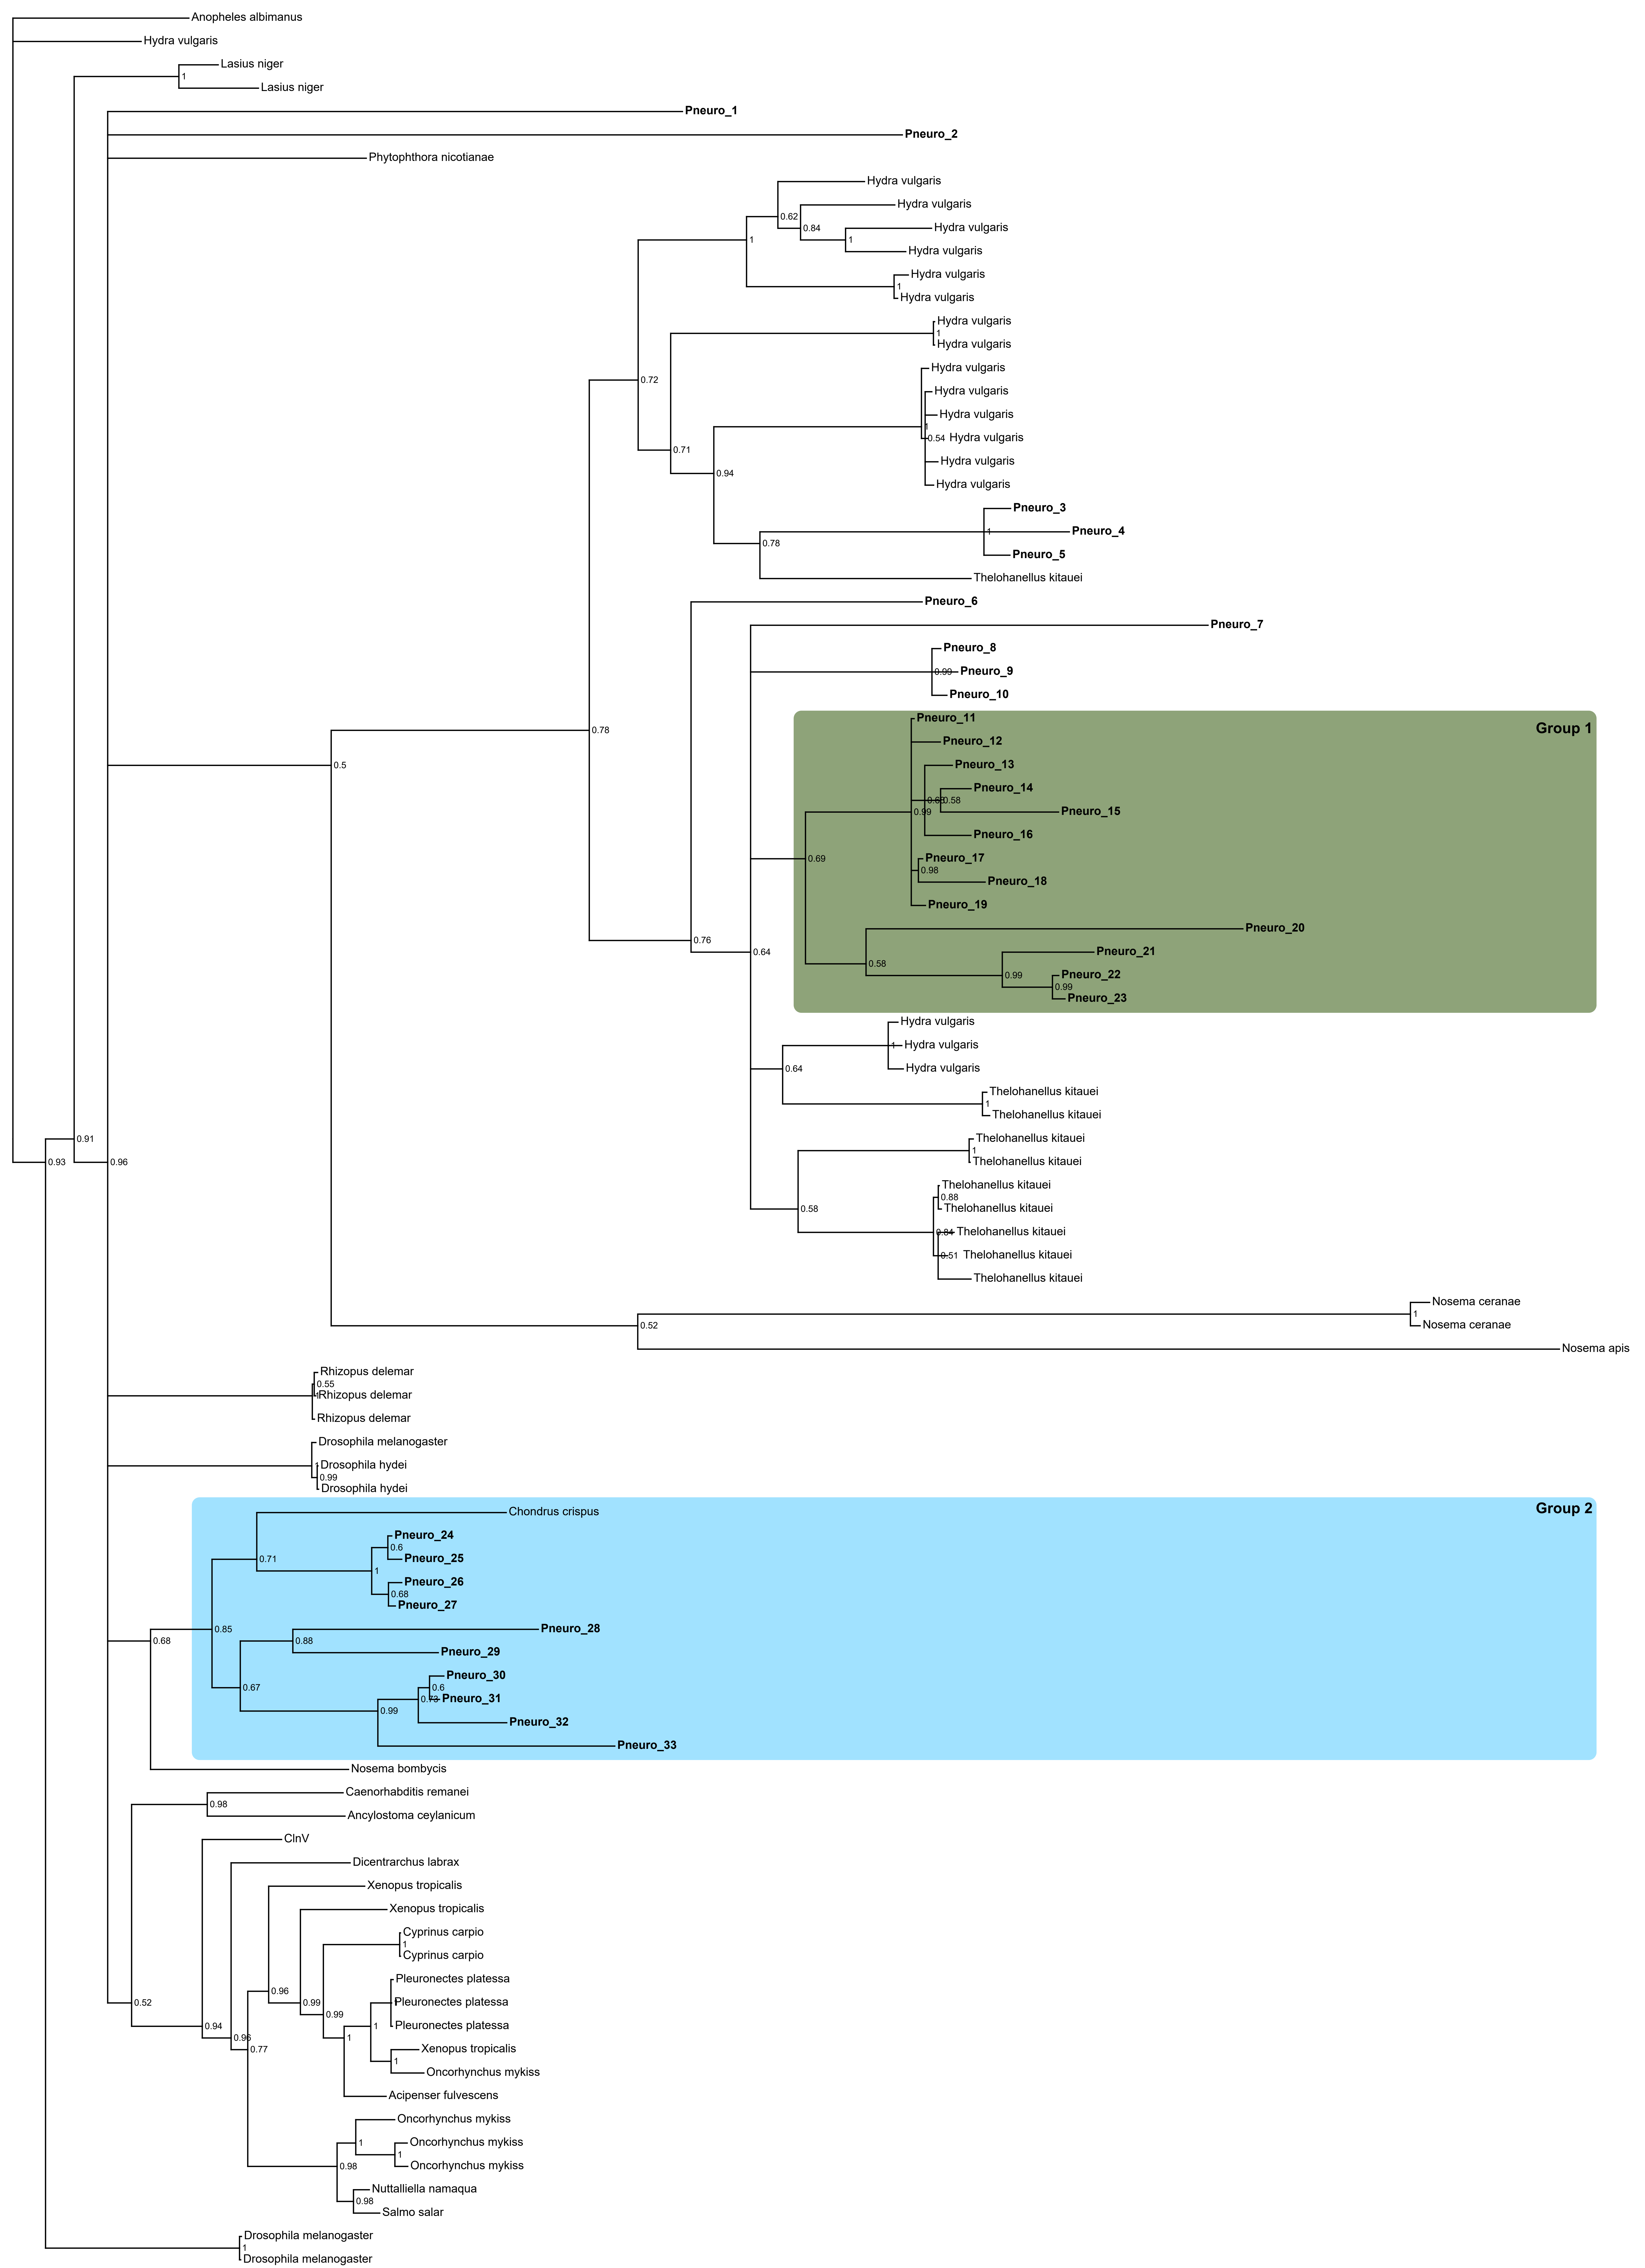

Cluster of 10 sequences from Saccharomycetes

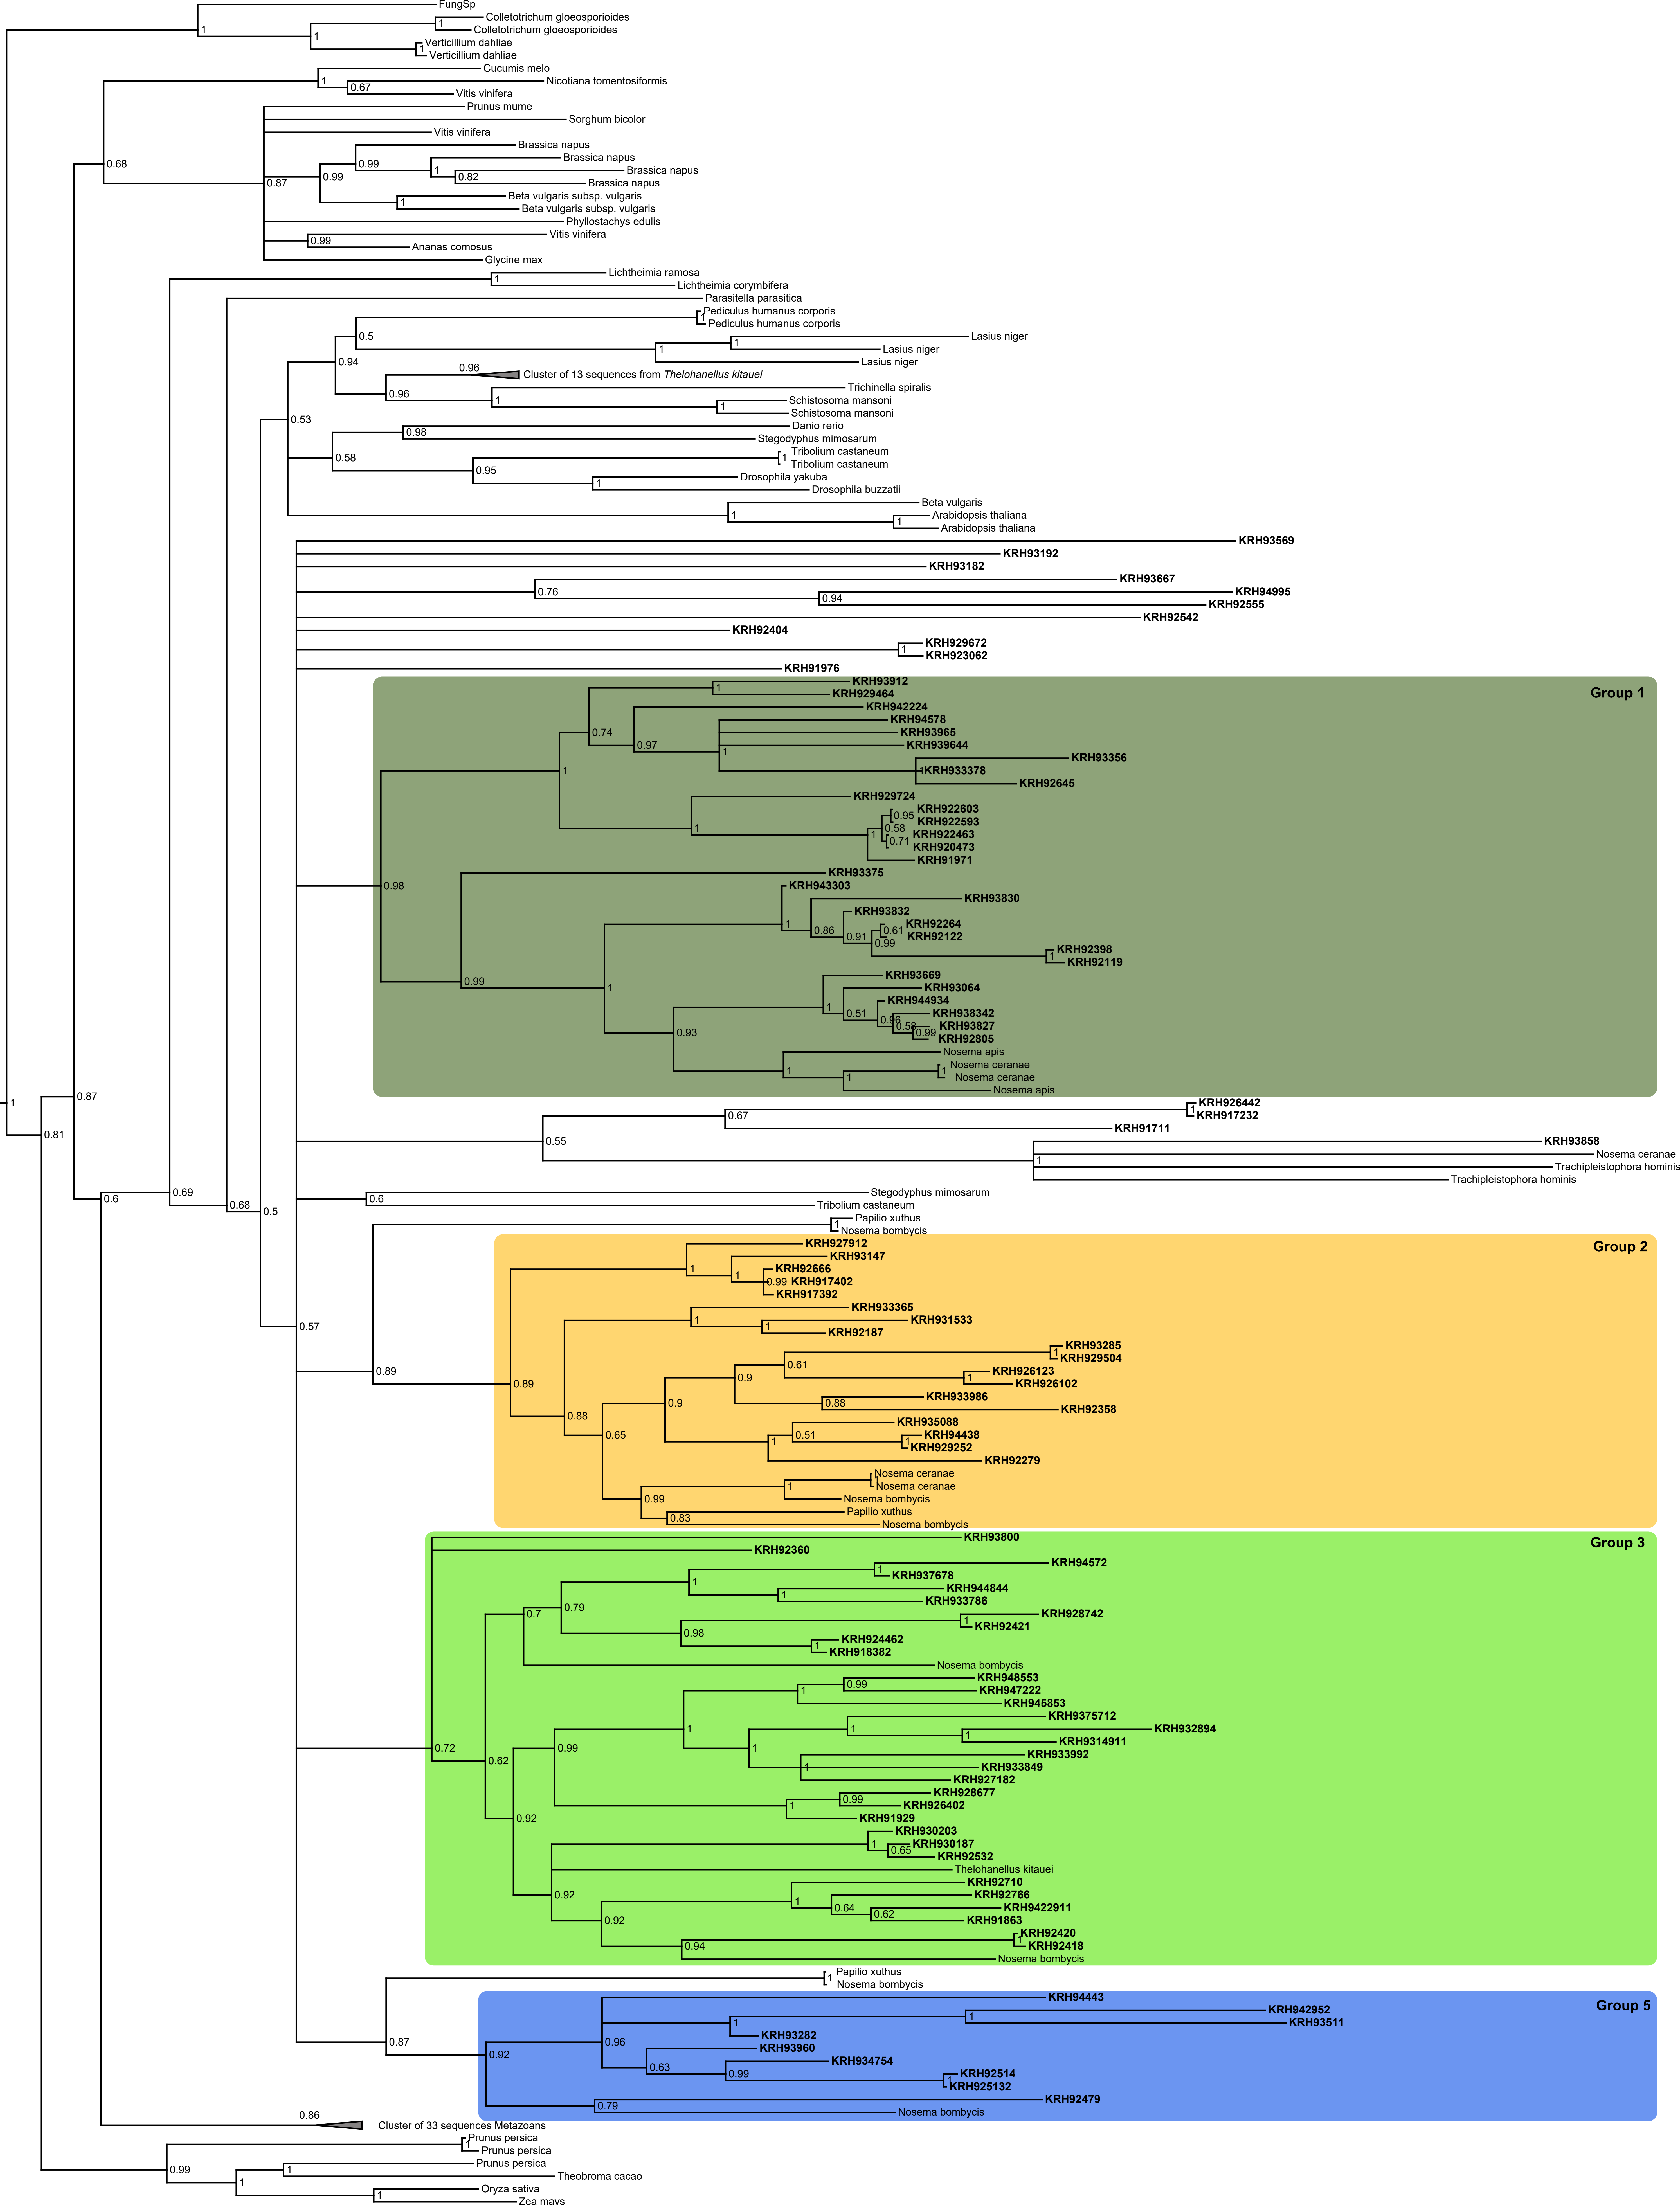

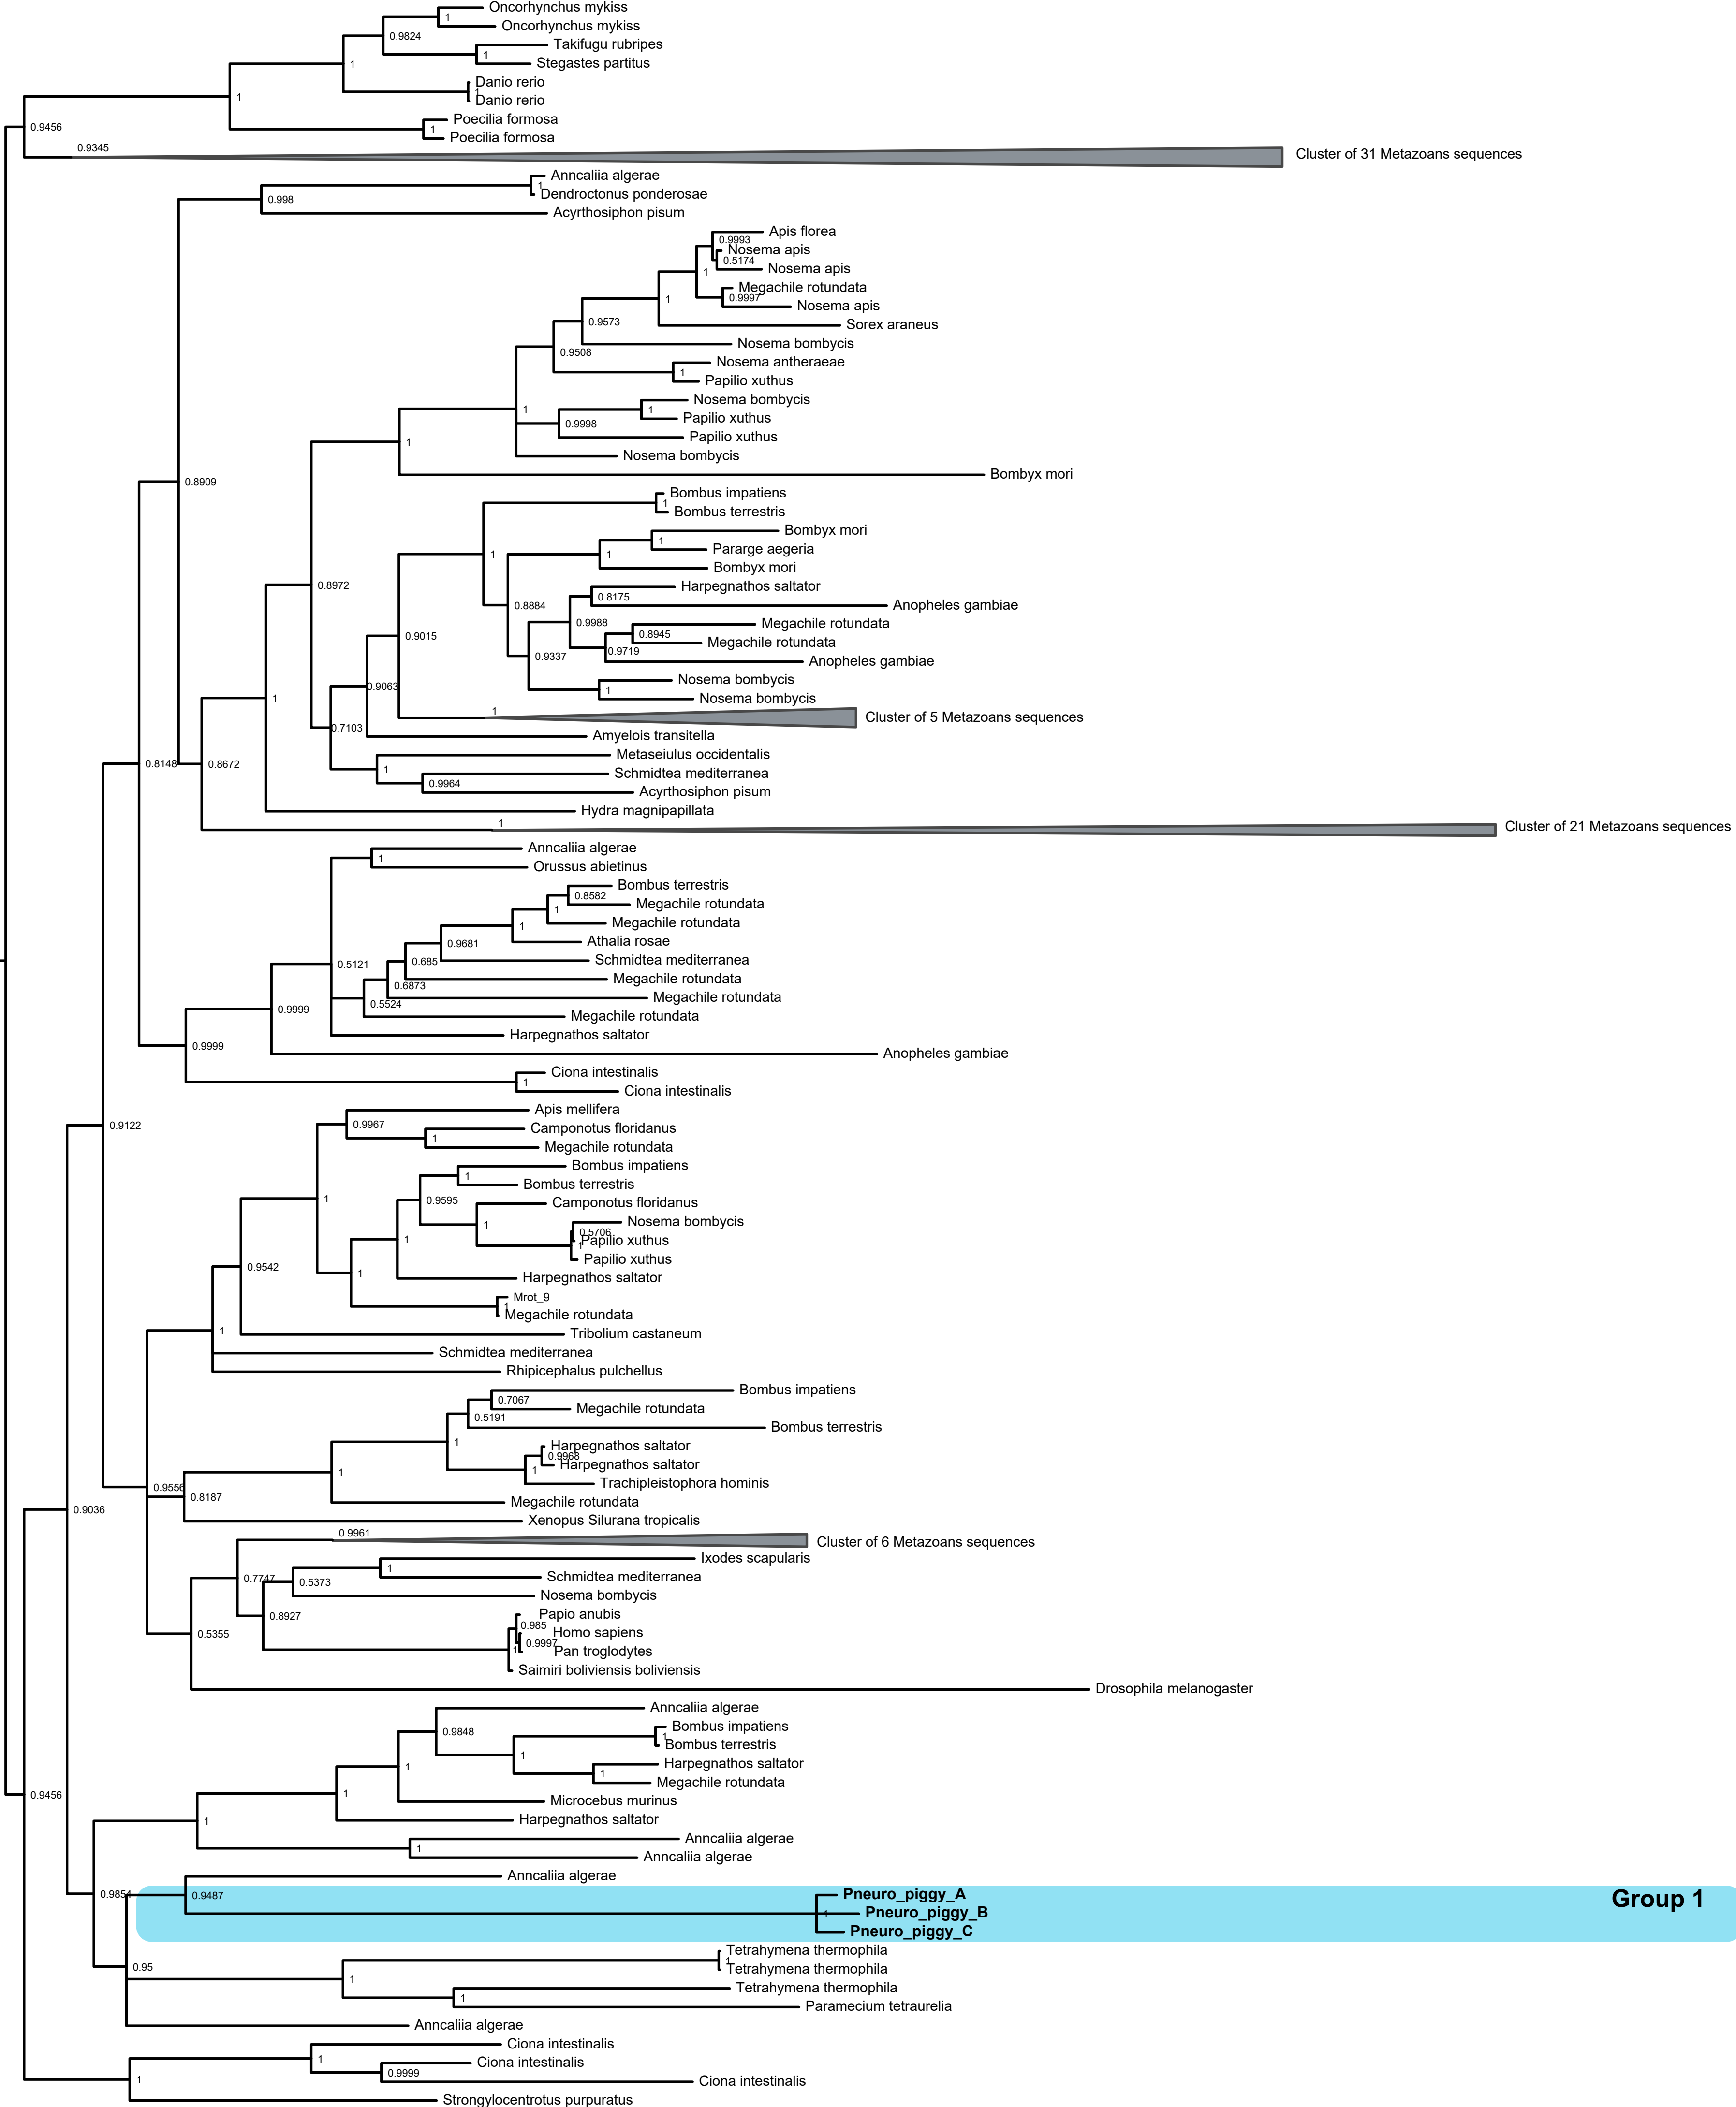

Cluster of 31 Metazoans sequences

Cluster of 5 Metazoans sequences

Cluster of 21 Metazoans sequences

Cluster of 6 Metazoans sequences

Group 1
